# Supplementary material for: Evaluation of Surface Data Simulation Performance with the Brazilian Global Atmospheric Model (BAM)
Source: MDPI journal article supplement (doi:10.3390/atmos14010125), 2023-01-06
Supplement: s1 [file s1]

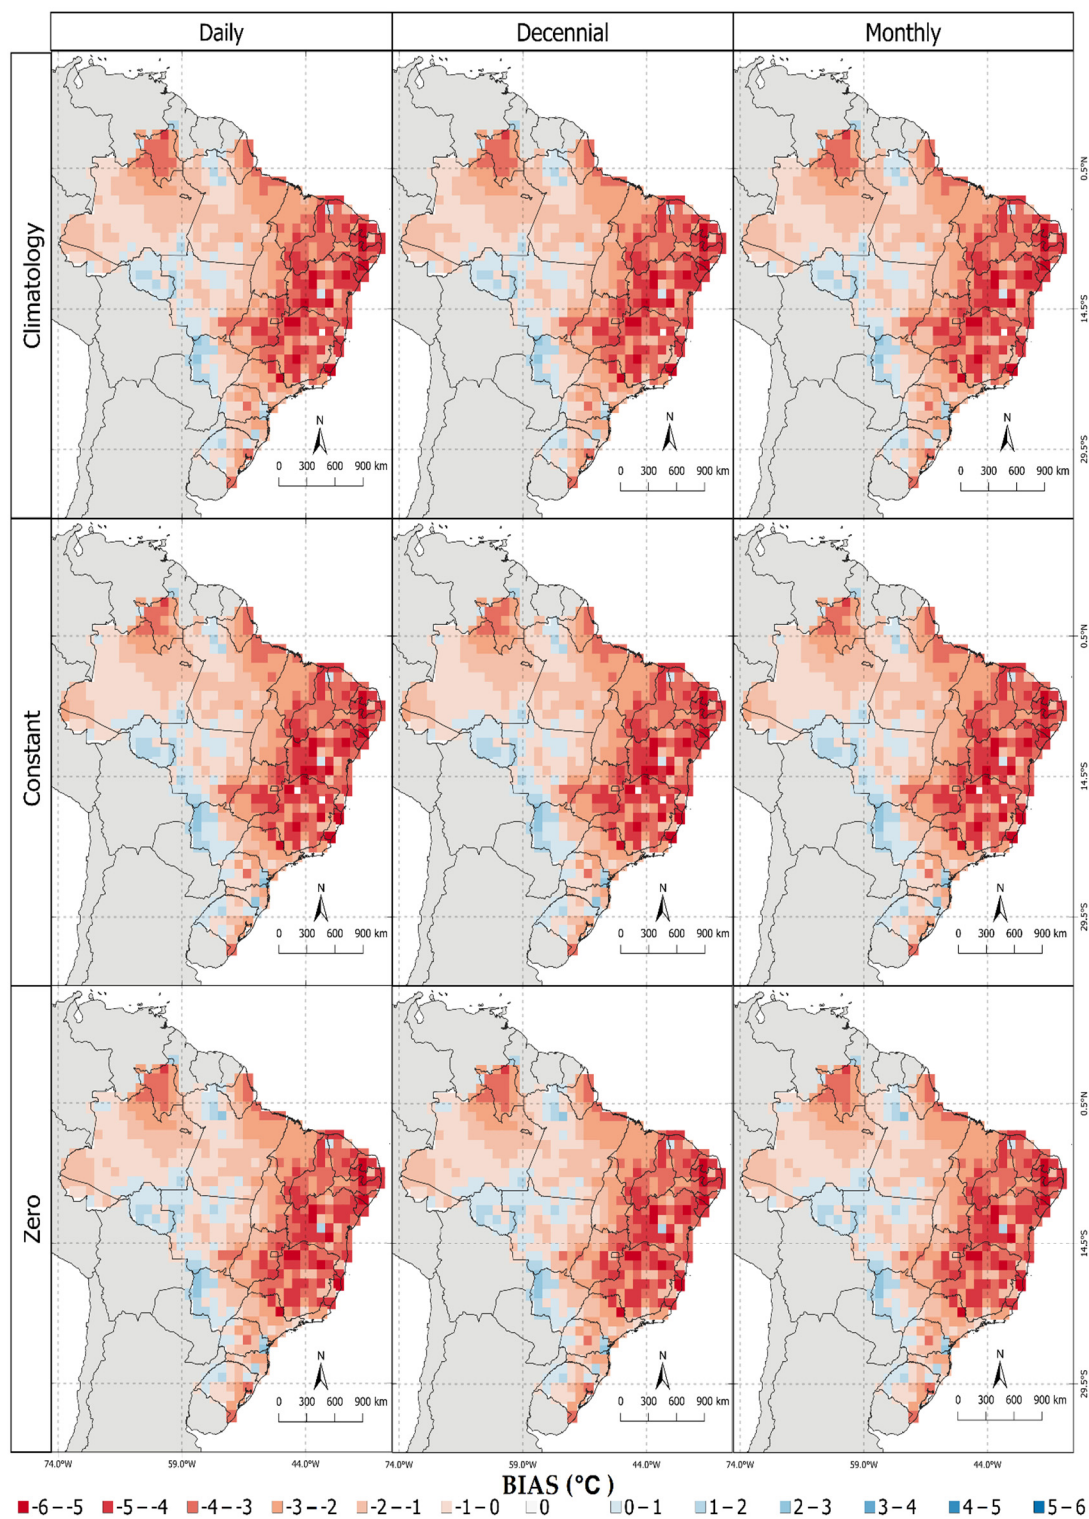

**Figure S1.** Maximum temperature BIAS (°C). The upper panel is derived from the BAM-CLIM simulations, the middle panel is derived from the BAM-CTE simulations, and the bottom panel is derived from the BAM-ZERO simulations. The left column shows BIAS on a daily scale, the middle column shows BIAS on a decennial scale, and the right column shows BIAS on a monthly scale.

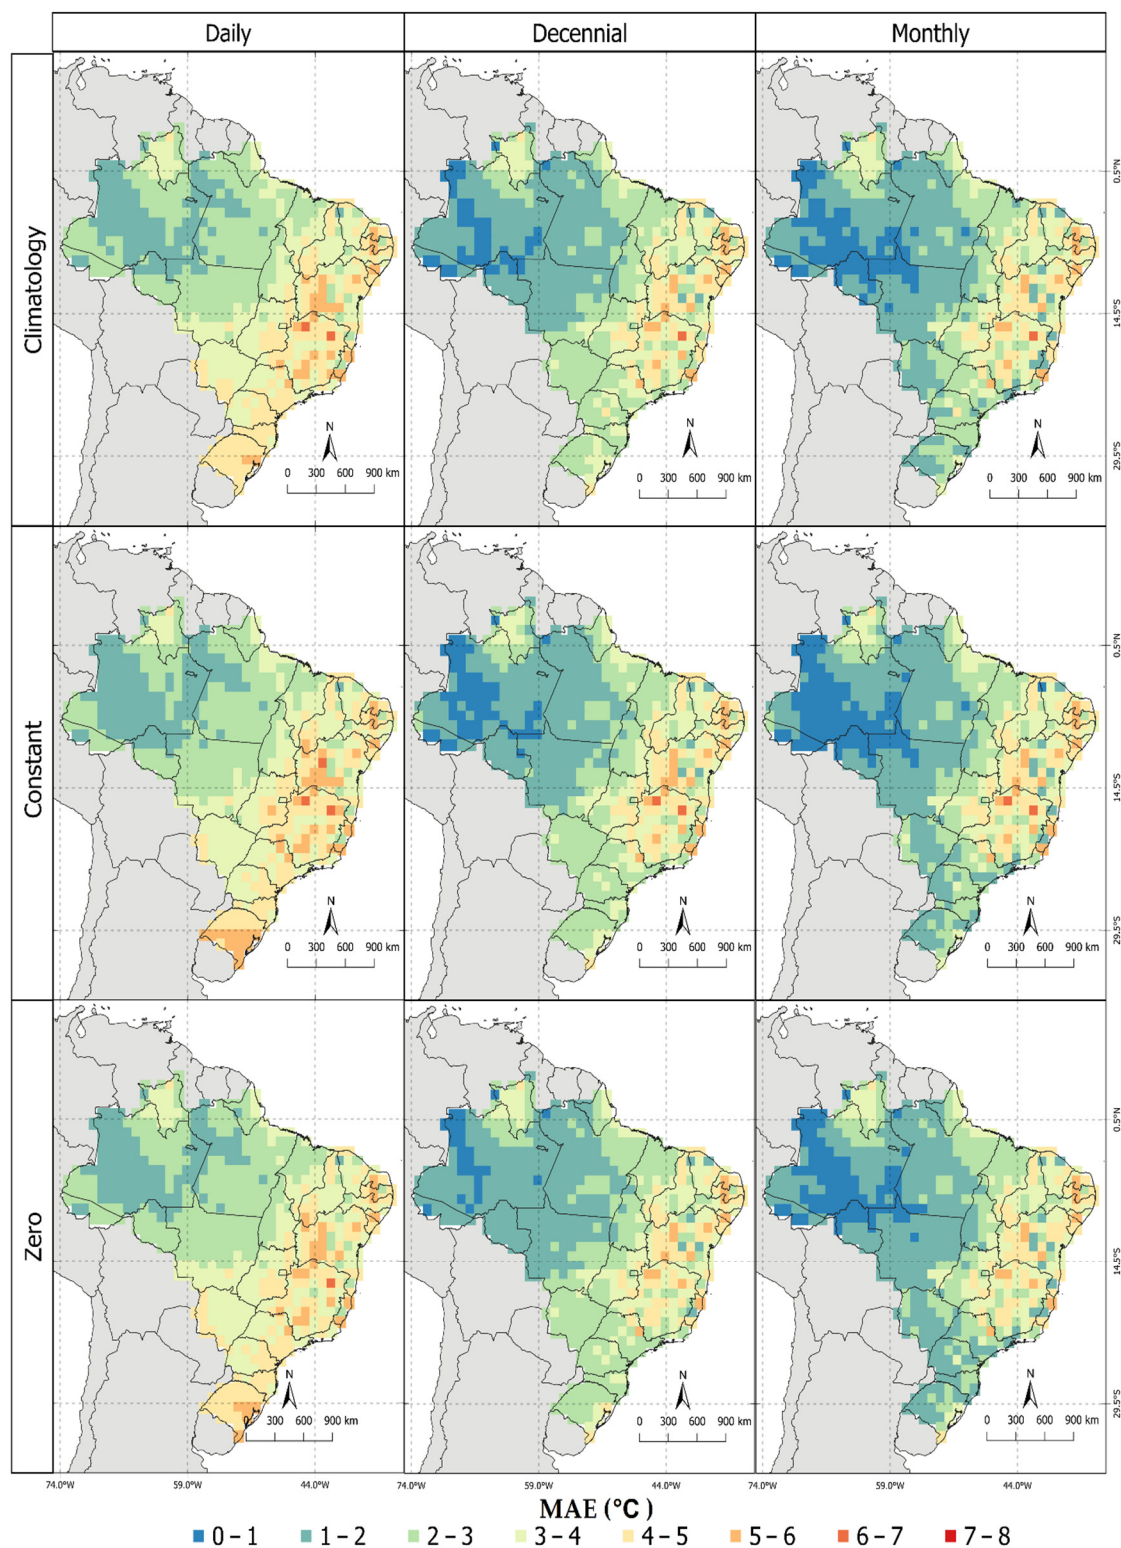

**Figure S2.** MAE of the maximum temperature (°C). The upper panel is derived from the BAM-CLIM simulations, the middle panel is derived from the BAM-CTE simulations, and the bottom panel is derived from the BAM-ZERO simulations. The left column shows MAE on a daily scale, the middle column shows MAE on a decennial scale, and the right column shows MAE on a monthly scale.

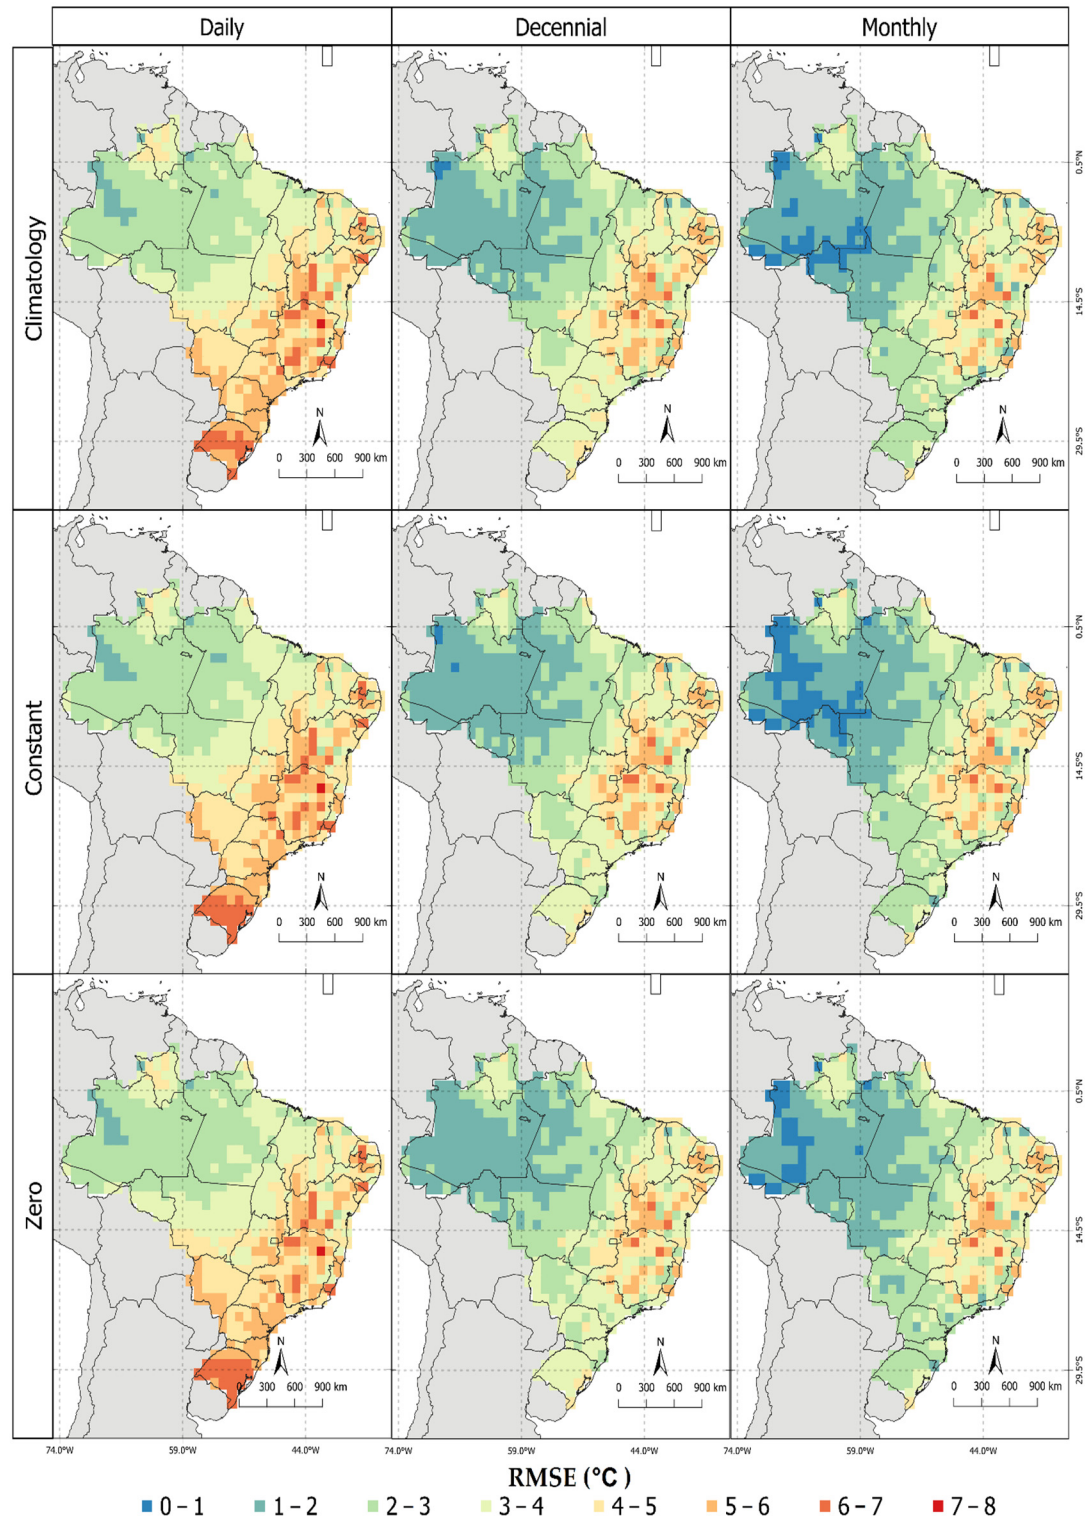

**Figure S3.** Maximum temperature RMSE (°C). The upper panel is derived from the BAM-CLIM simulations, the middle panel is derived from the BAM-CTE simulations, and the bottom panel is derived from the BAM-ZERO simulations. The left column shows RMSE on a daily scale, the middle column shows RMSE on a decennial scale, and the right column shows RMSE on a monthly scale.



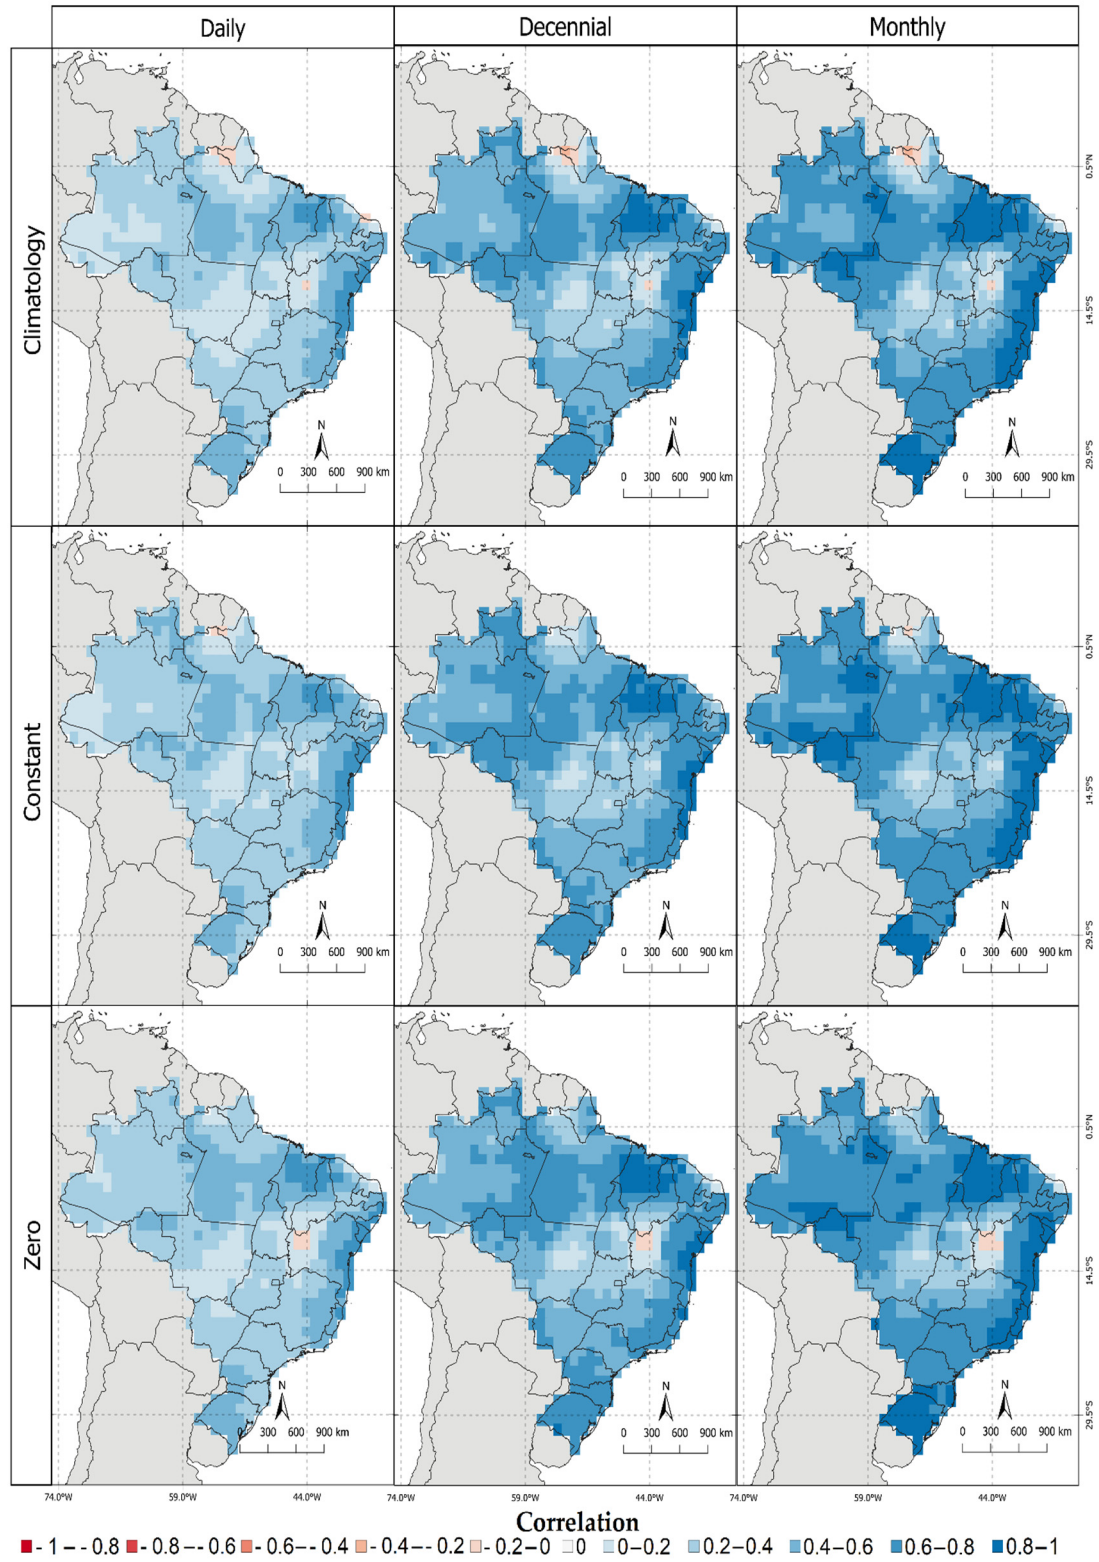

**Figure S4.** Maximum temperature correlation. The upper panel is derived from the BAM-CLIM simulations, the middle panel is derived from the BAM-CTE simulations, and the bottom panel is derived from the BAM-ZERO simulations. The left column shows correlation on a daily scale, the middle column shows correlation on a decennial scale, and the right column shows correlation on a monthly scale.



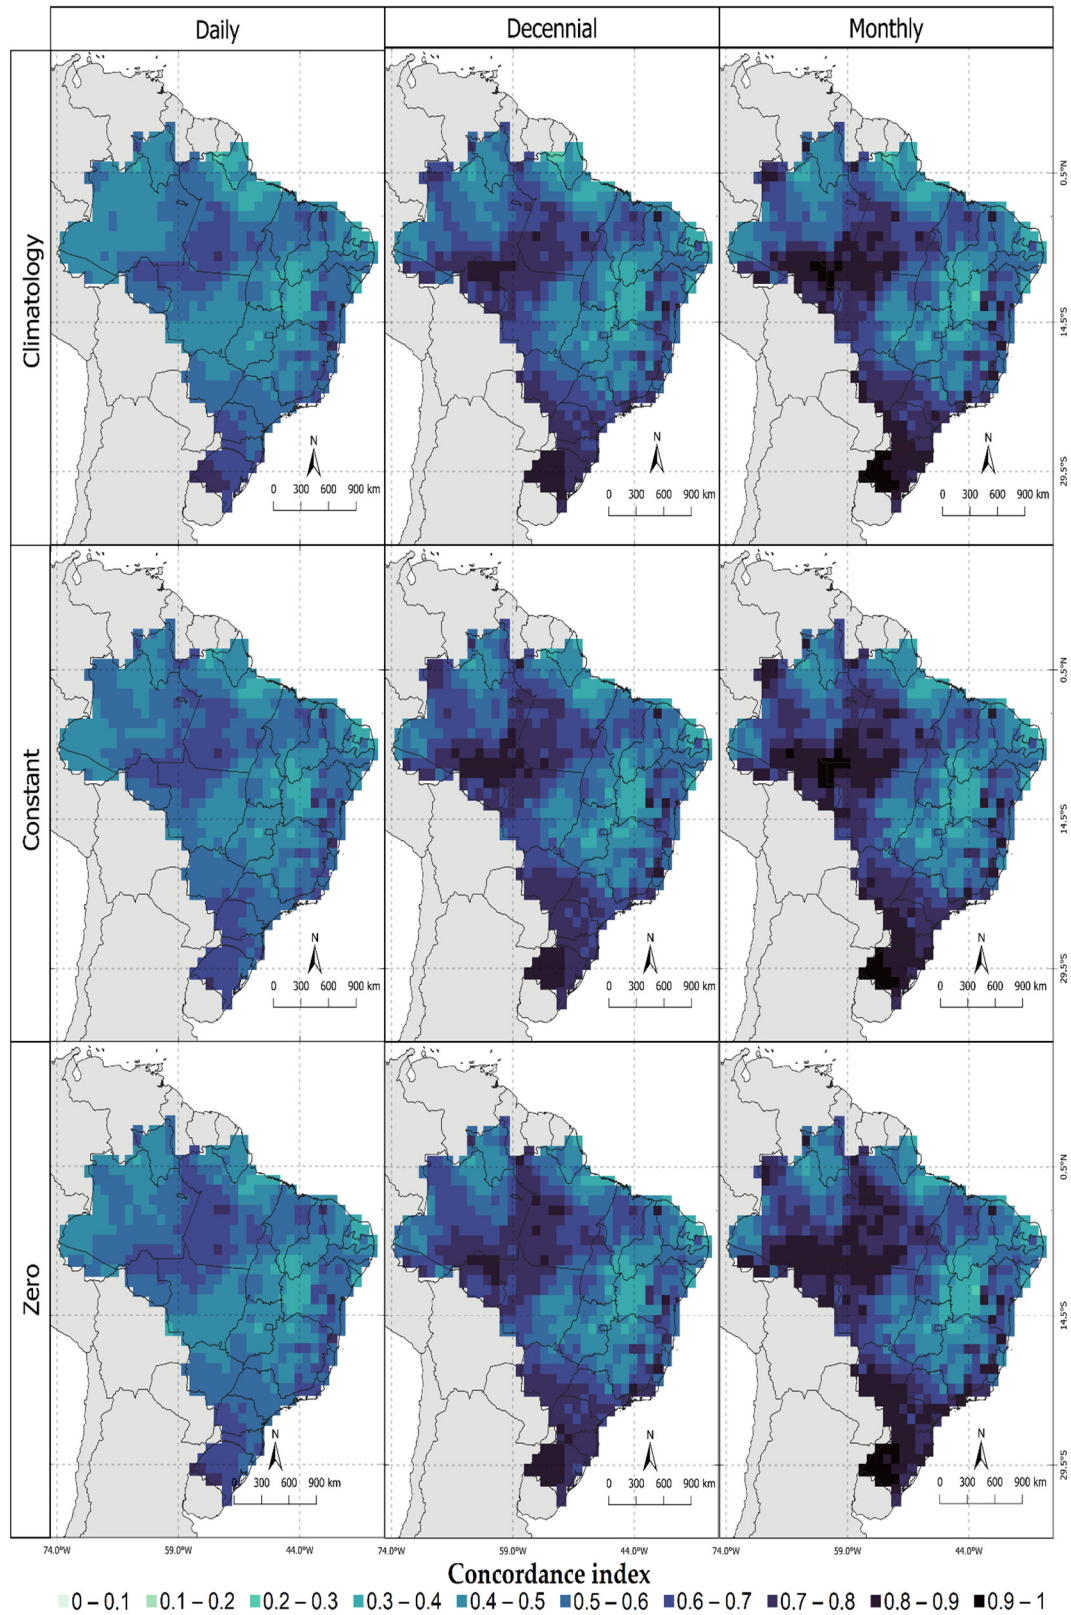

**Figure S5.** Maximum temperature CI. The upper panel is derived from the BAM-CLIM simulations, the middle panel is derived from the BAM-CTE simulations, and the bottom panel is derived from the BAM-ZERO simulations. The left column shows CI on a daily scale, the middle column shows CI on a decennial scale, and the right column shows CI on a monthly scale.

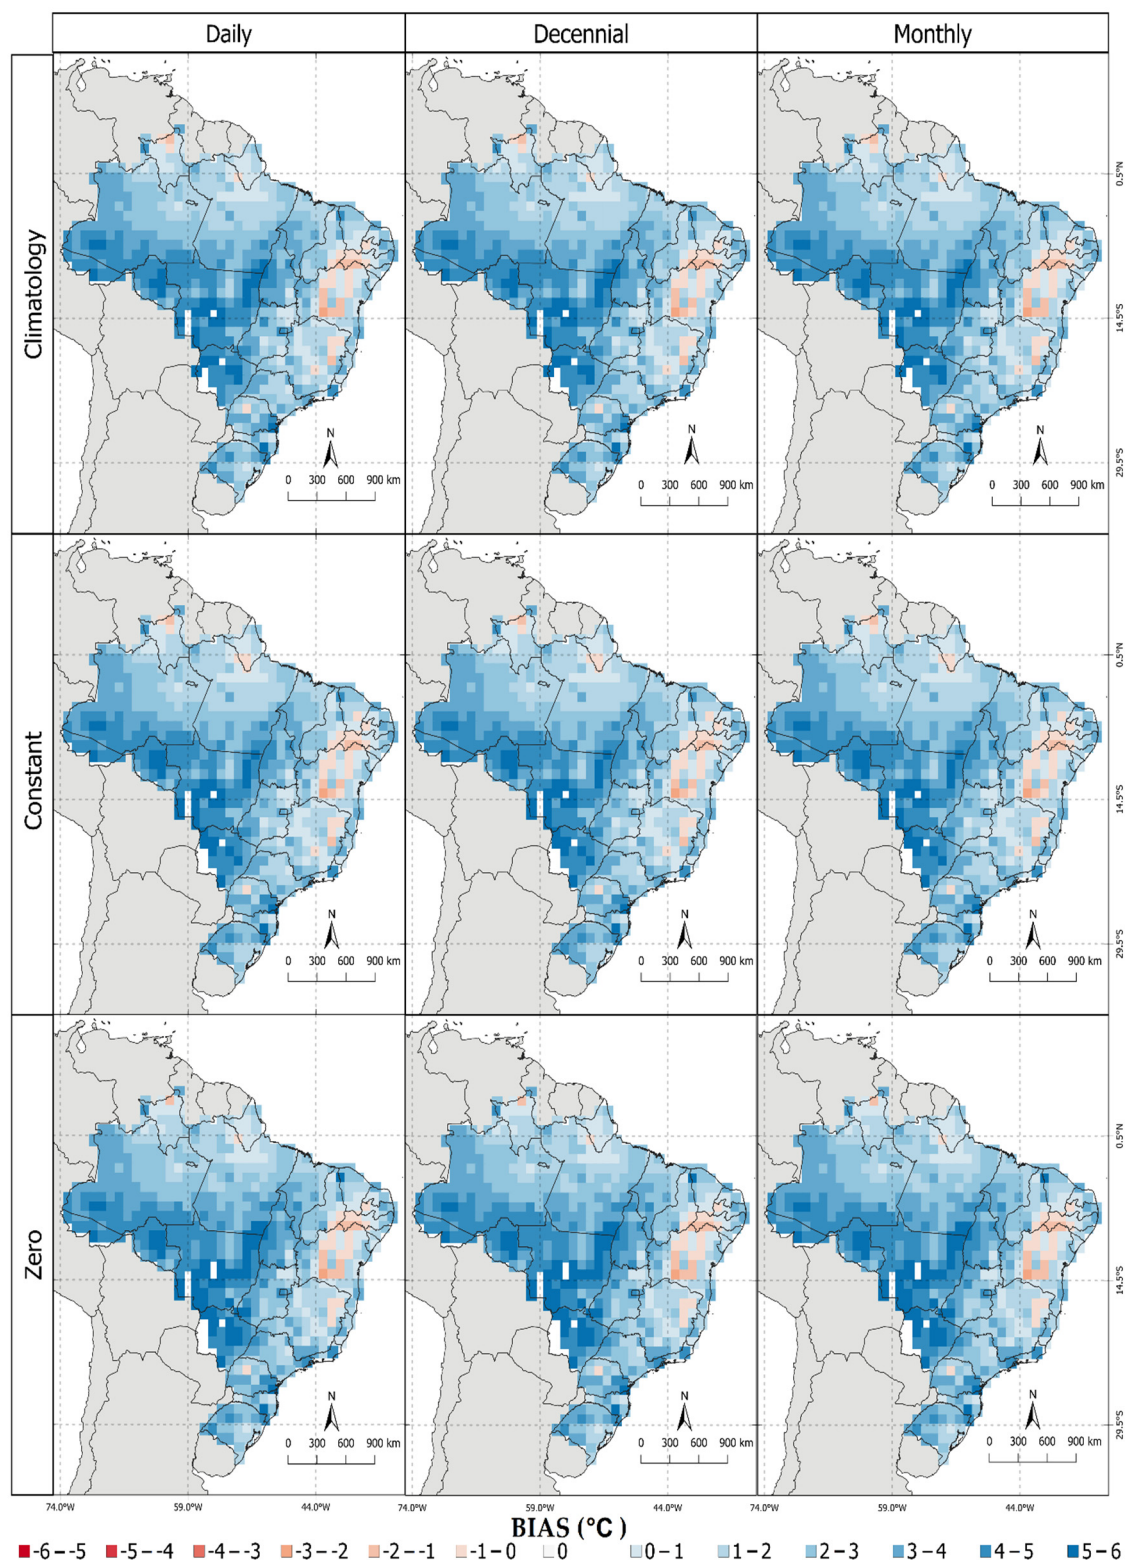

**Figure S6.** Minimum temperature BIAS (°C). The upper panel is derived from the BAM-CLIM simulations, the middle panel is derived from the BAM-CTE simulations, and the bottom panel is derived from the BAM-ZERO simulations. The left column shows BIAS on a daily scale, the middle column shows BIAS on a decennial scale, and the right column shows BIAS on a monthly scale.

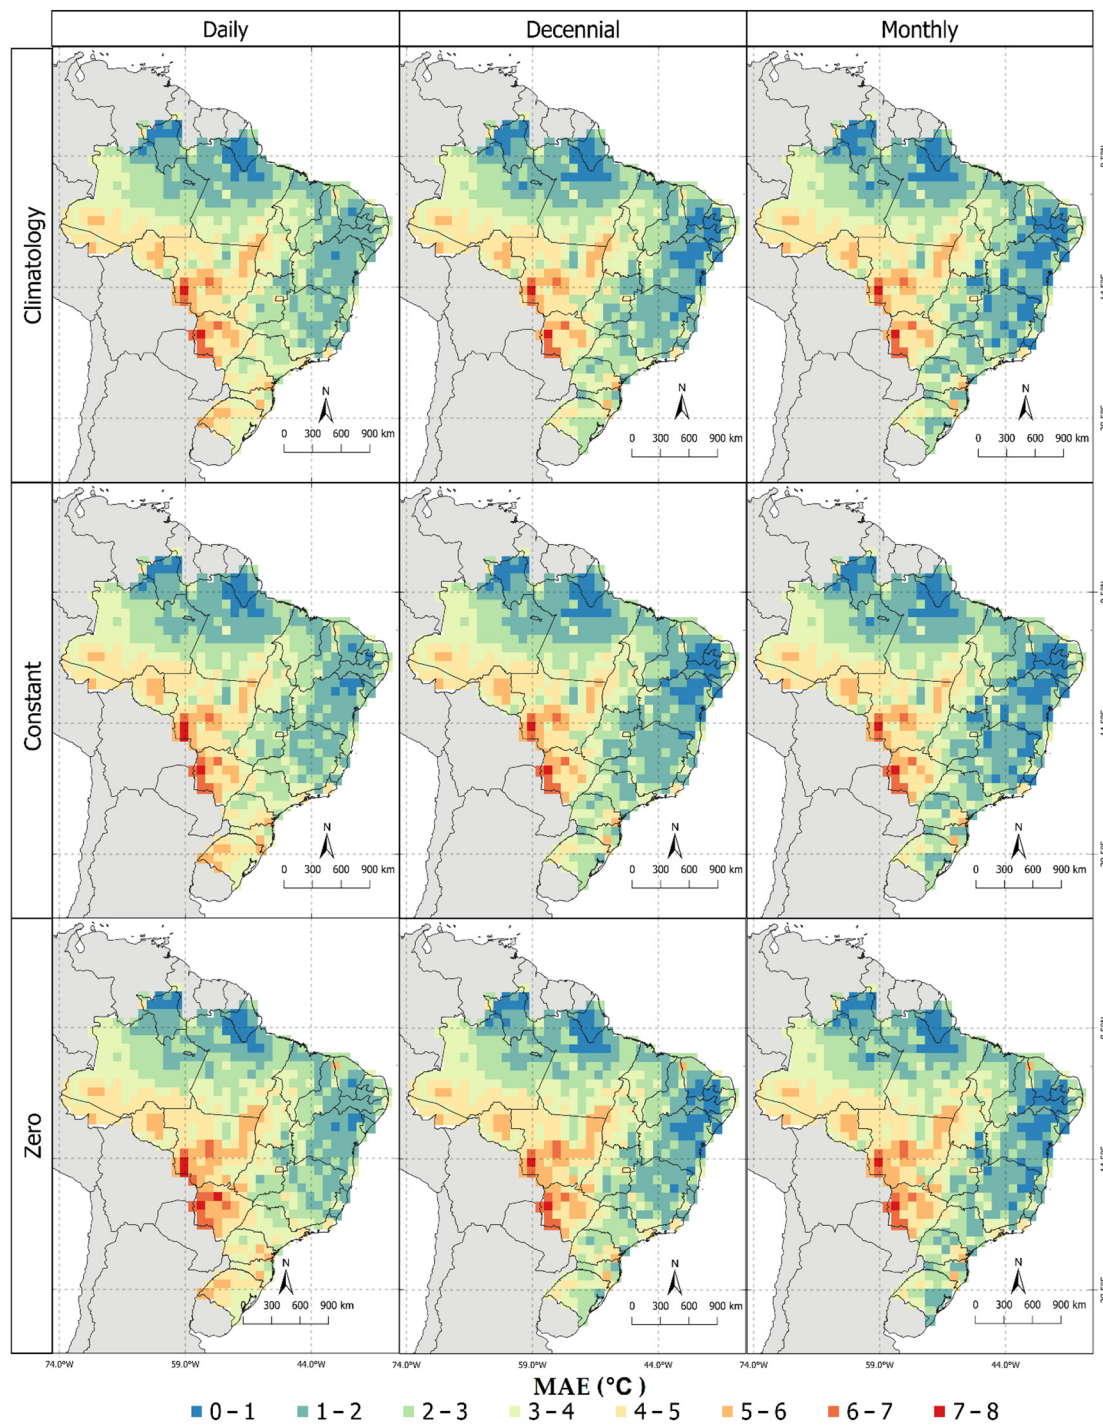

**Figure S7.** MAE of the minimum temperature (°C). The upper panel is derived from the BAM-CLIM simulations, the middle panel is derived from the BAM-CTE simulations, and the bottom panel is derived from the BAM-ZERO simulations. The left column shows MAE on a daily scale, the middle column shows MAE on a decennial scale, and the right column shows MAE on a monthly scale.



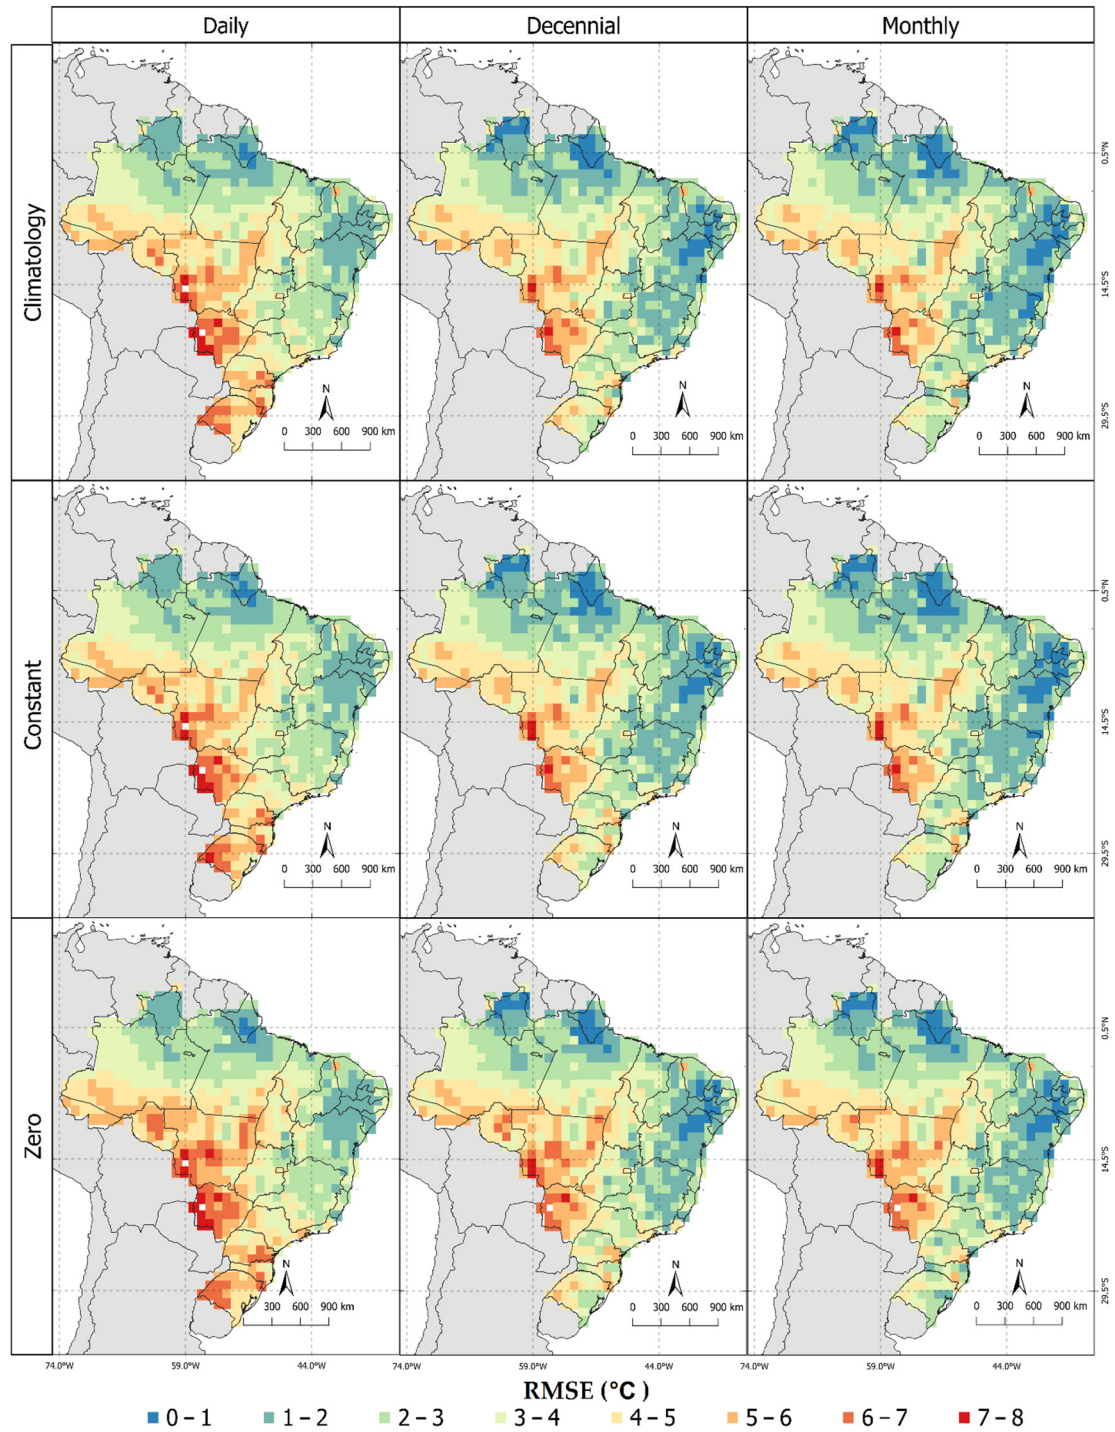

**Figure S8.** Minimum temperature RMSE (°C). The upper panel is derived from the BAM-CLIM simulations, the middle panel is derived from the BAM-CTE simulations, and the bottom panel is derived from the BAM-ZERO simulations. The left column shows RMSE on a daily scale, the middle column shows RMSE on a decennial scale, and the right column shows RMSE on a monthly scale.

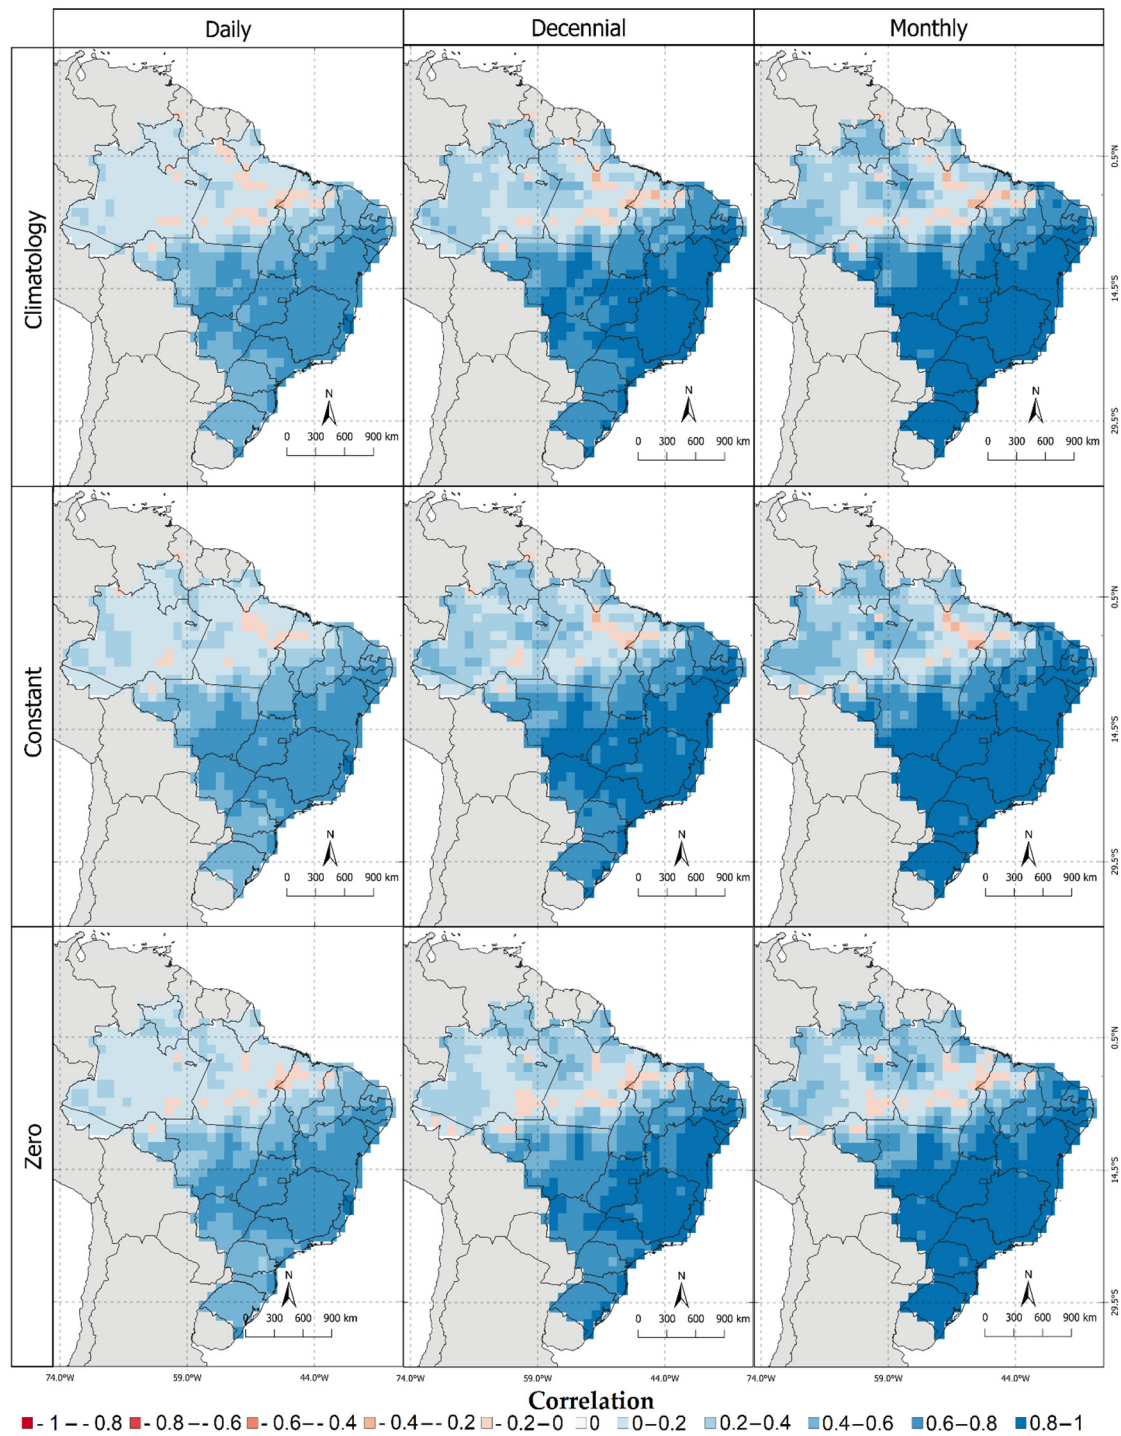

**Figure S9.** Minimum temperature correlation. The upper panel is derived from the BAM-CLIM simulations, the middle panel is derived from the BAM-CTE simulations, and the bottom panel is derived from the BAM-ZERO simulations. The left column shows correlation on a daily scale, the middle column shows correlation on a decennial scale, and the right column shows correlation on a monthly scale.

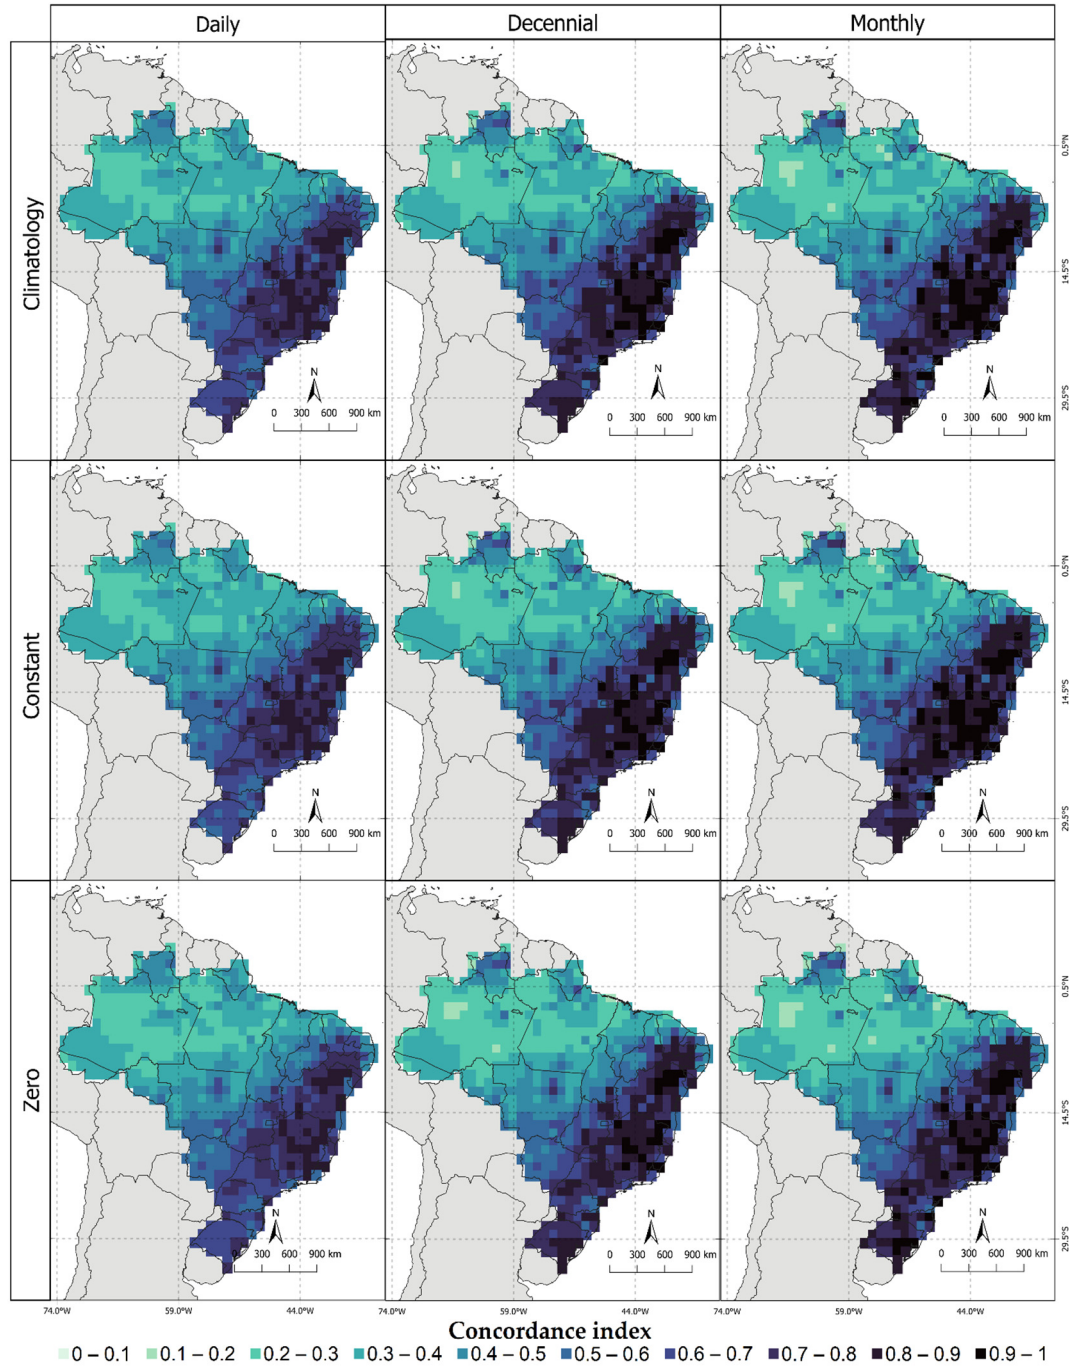

**Figure S10.** Minimum temperature CI. The upper panel is derived from the BAM-CLIM simulations, the middle panel is derived from the BAM-CTE simulations, and the bottom panel is derived from the BAM-ZERO simulations. The left column shows CI on a daily scale, the middle column shows CI on a decennial scale, and the right column shows CI on a monthly scale.



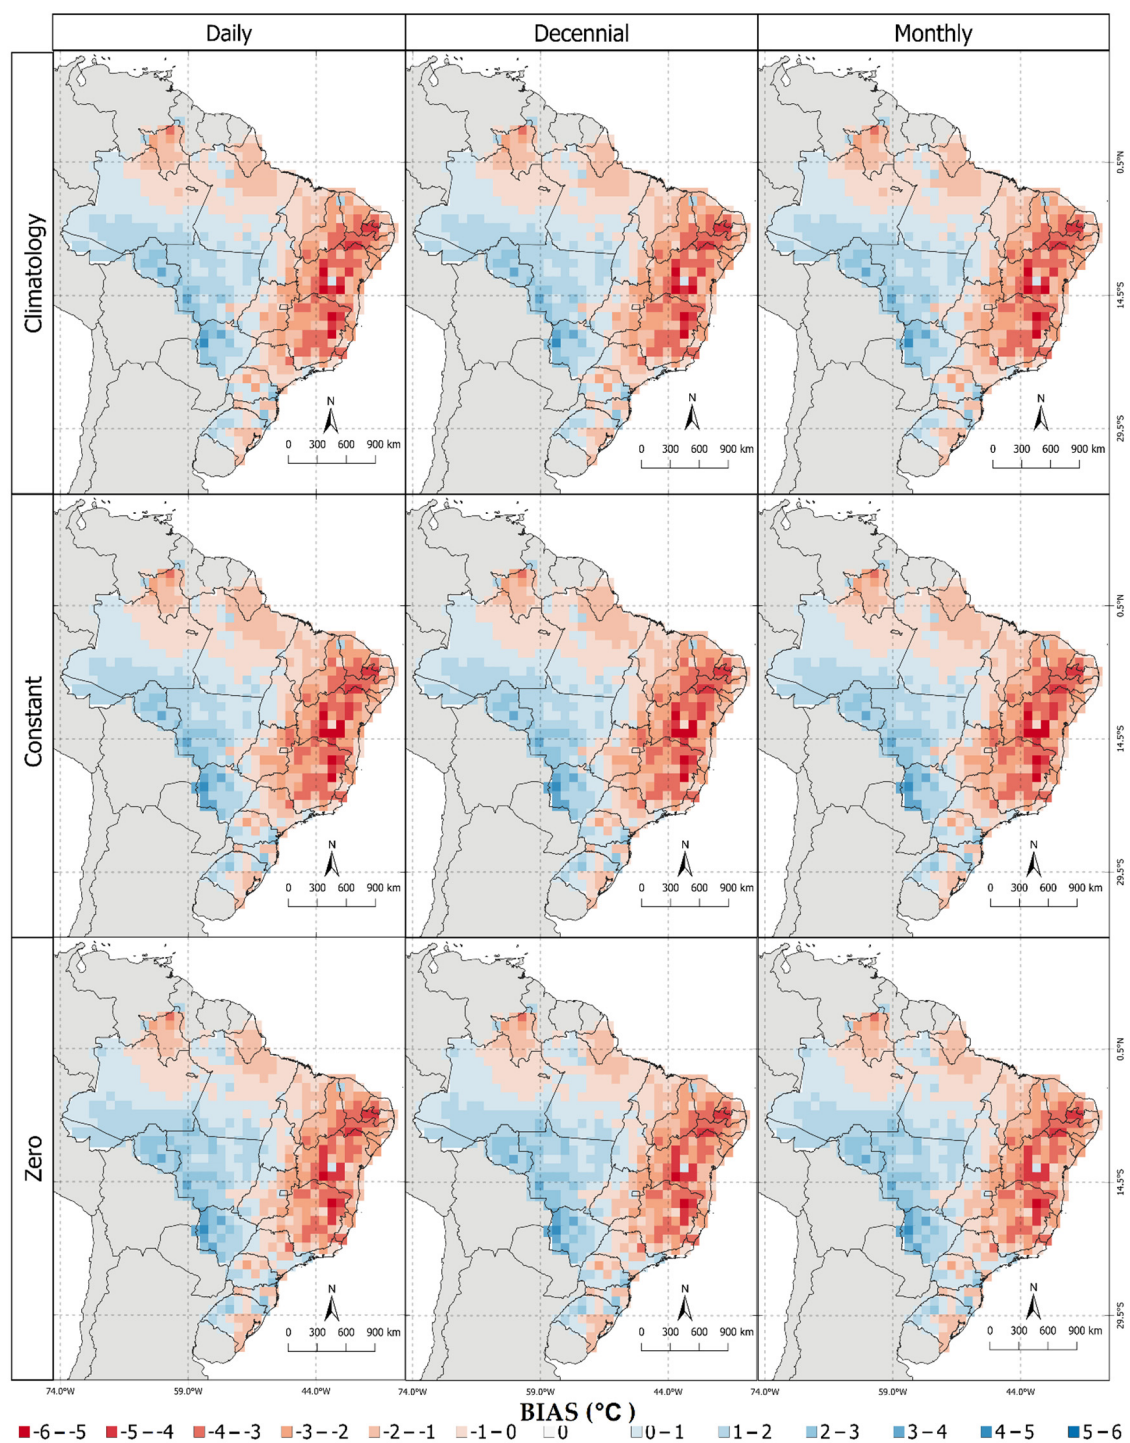

**Figure S11.** Average temperature BIAS (°C). The upper panel is derived from the BAM-CLIM simulations, the middle panel is derived from the BAM-CTE simulations, and the bottom panel is derived from the BAM-ZERO simulations. The left column shows BIAS on a daily scale, the middle column shows BIAS on a decennial scale, and the right column shows BIAS on a monthly scale.

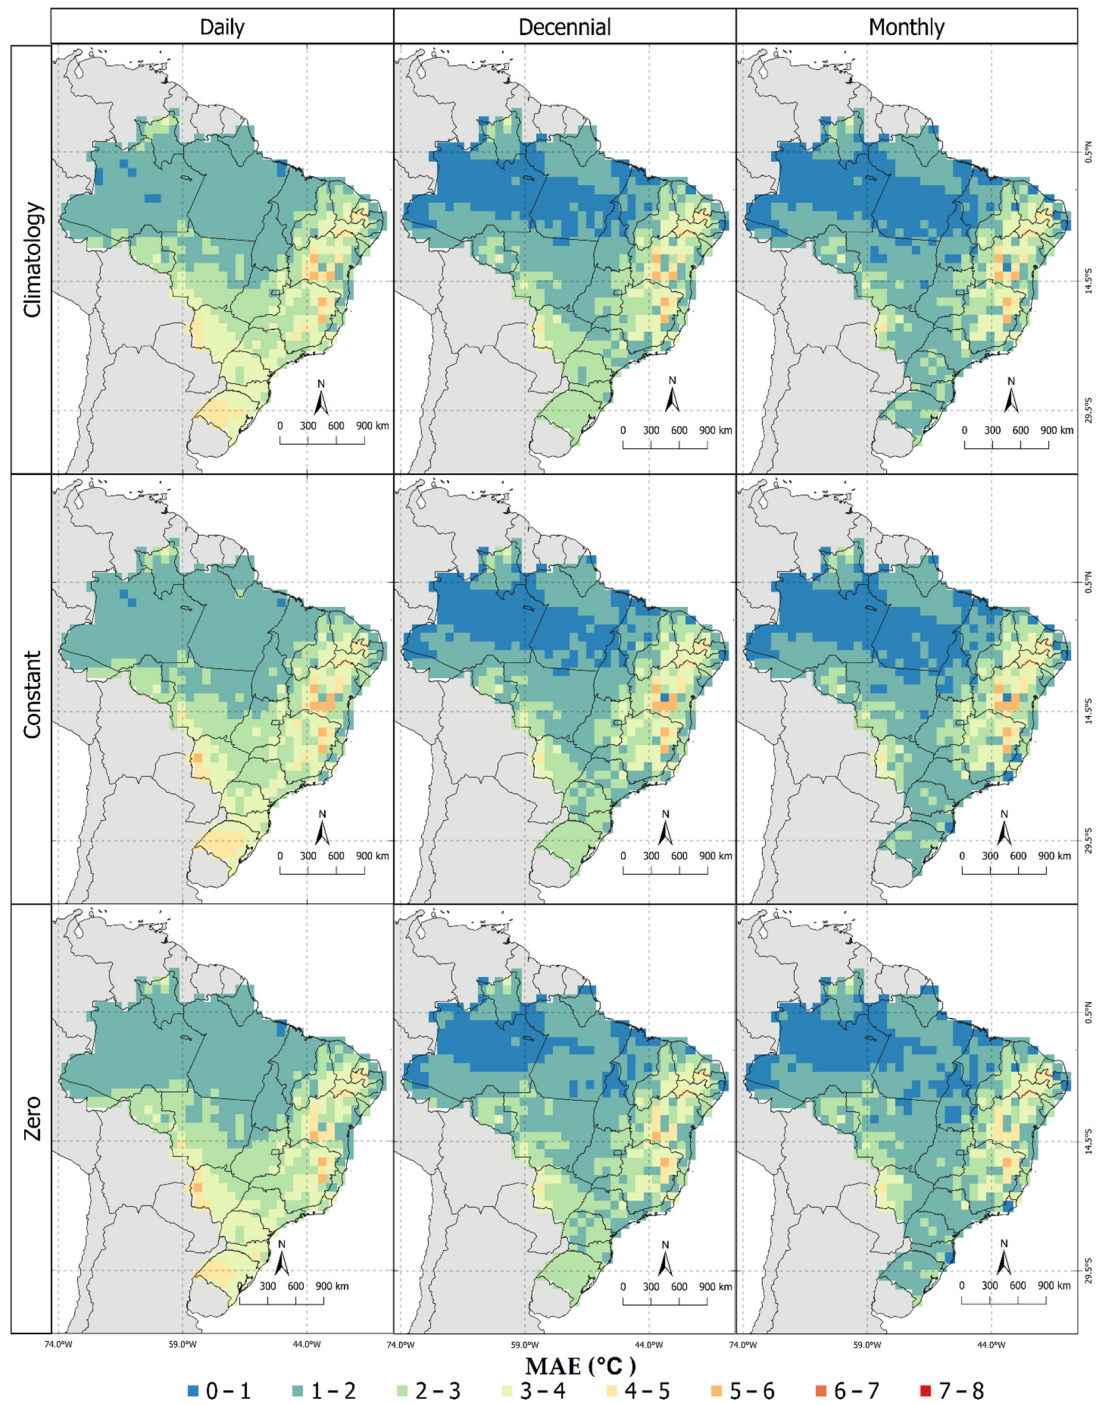

**Figure S12.** MAE of mean temperature (°C). The upper panel is derived from the BAM-CLIM simulations, the middle panel is derived from the BAM-CTE simulations, and the bottom panel is derived from the BAM-ZERO simulations. The left column shows MAE on a daily scale, the middle column shows MAE on a decennial scale, and the right column shows MAE on a monthly scale.

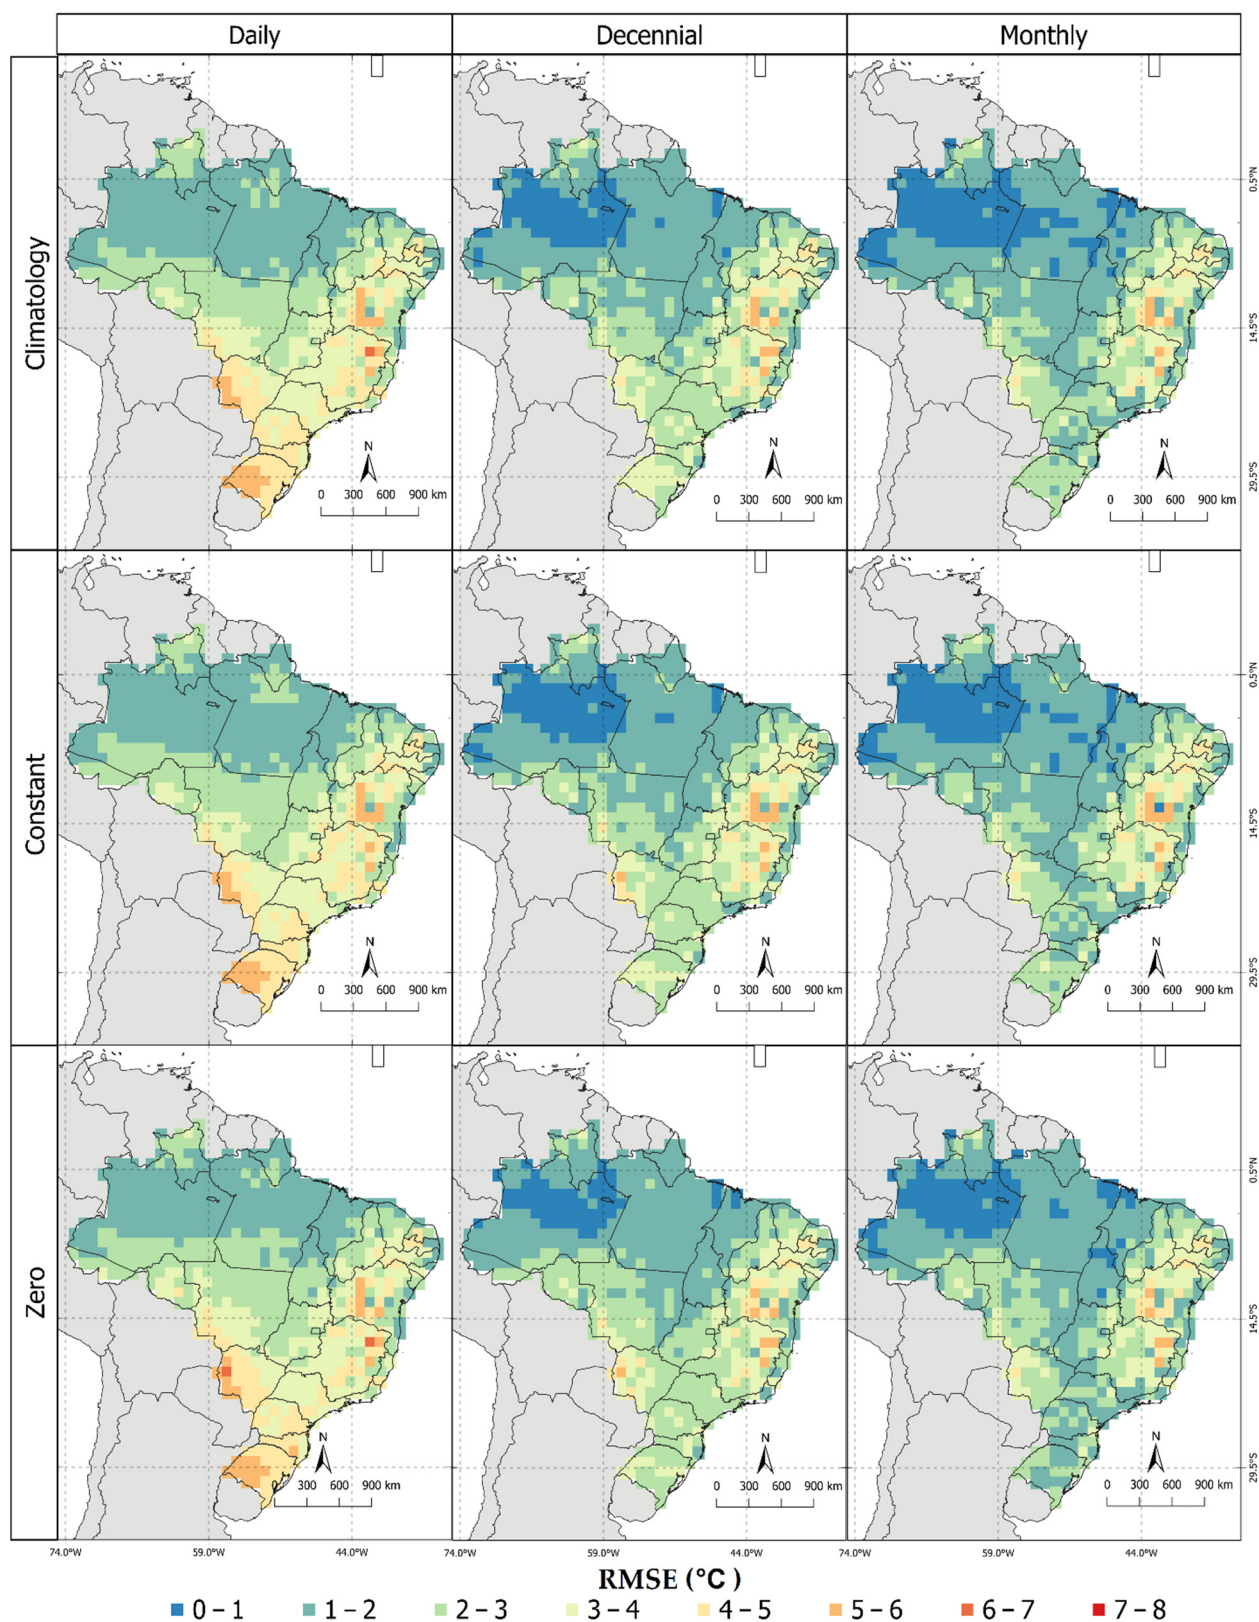

**Figure S13.** RMSE of mean temperature ( $^{\circ}\text{C}$ ). The upper panel is derived from the BAM-CLIM simulations, the middle panel is derived from the BAM-CTE simulations, and the bottom panel is derived from the BAM-ZERO simulations. The left column shows RMSE on a daily scale, the middle column shows RMSE on a decennial scale, and the right column shows RMSE on a monthly scale.



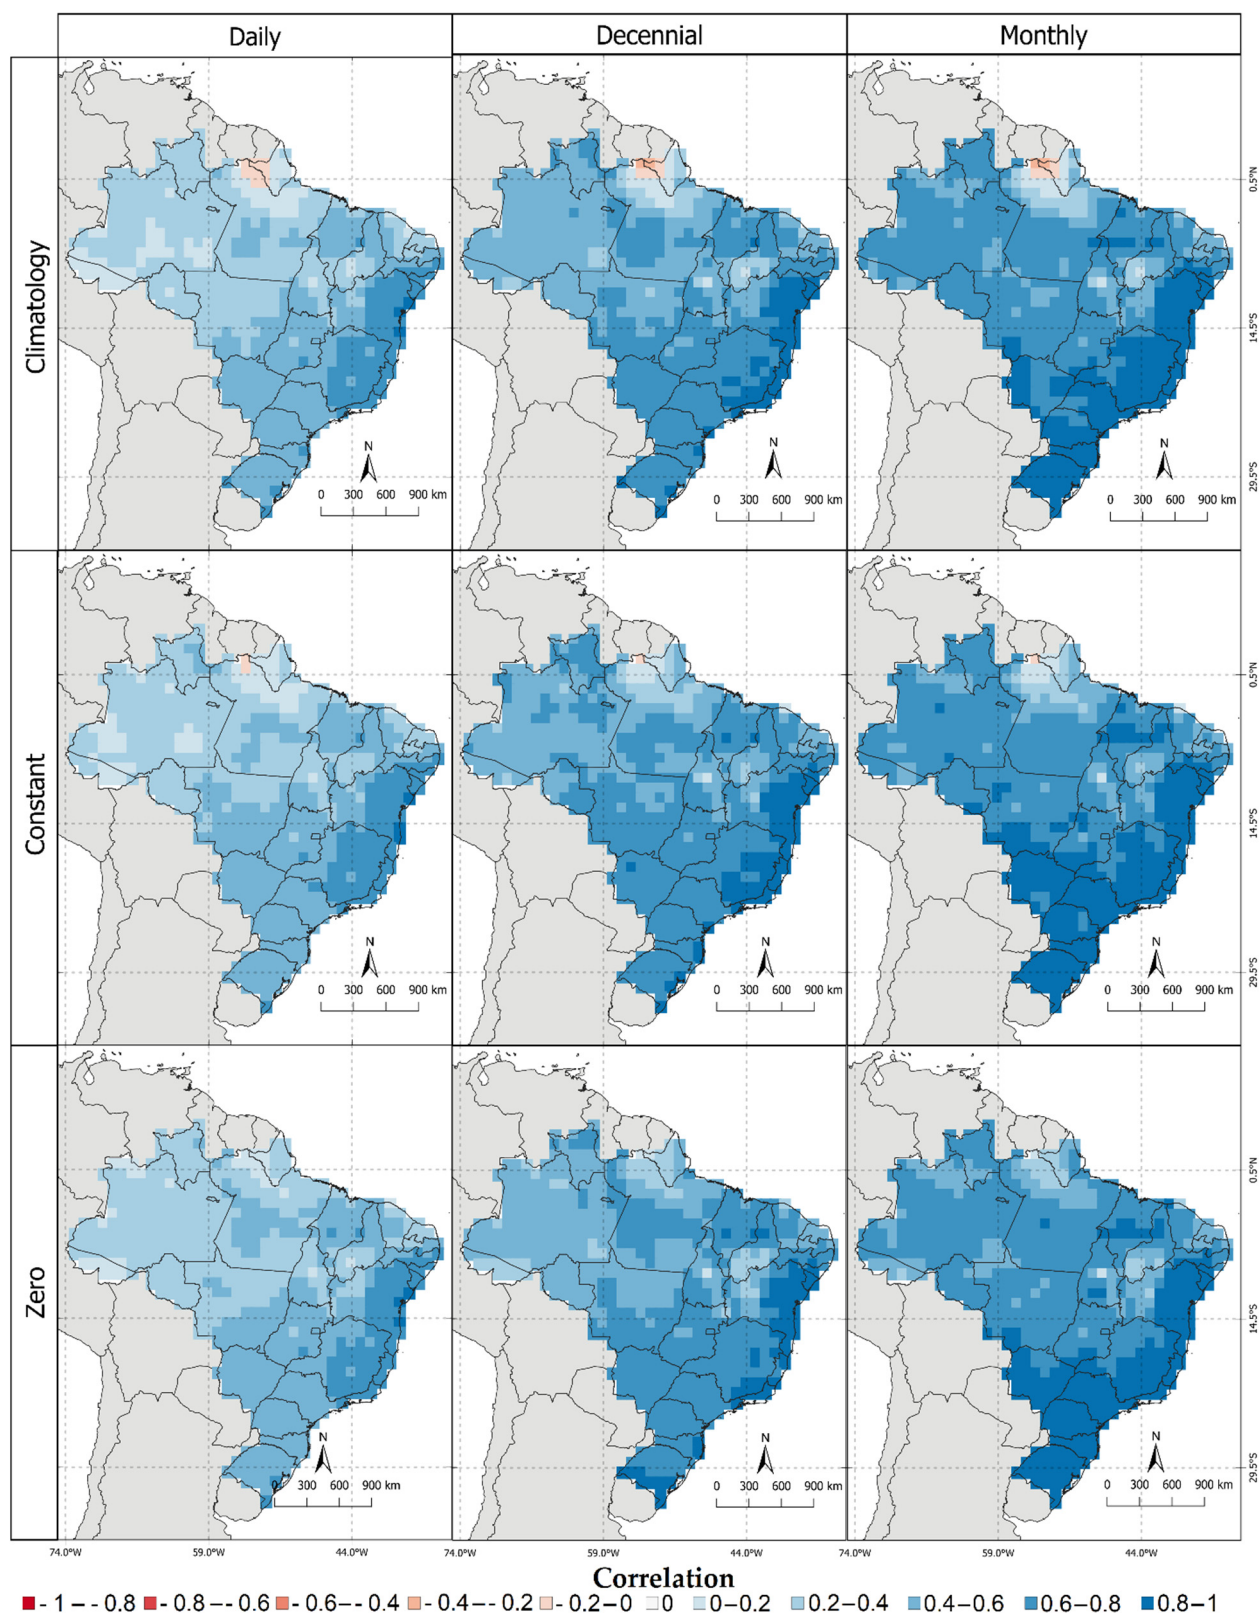

**Figure S14.** Correlation of mean temperature. The upper panel is derived from the BAM-CLIM simulations, the middle panel is derived from the BAM-CTE simulations, and the bottom panel is derived from the BAM-ZERO simulations. The left column shows correlation on a daily scale, the middle column shows correlation on a decennial scale, and the right column shows correlation on a monthly scale.

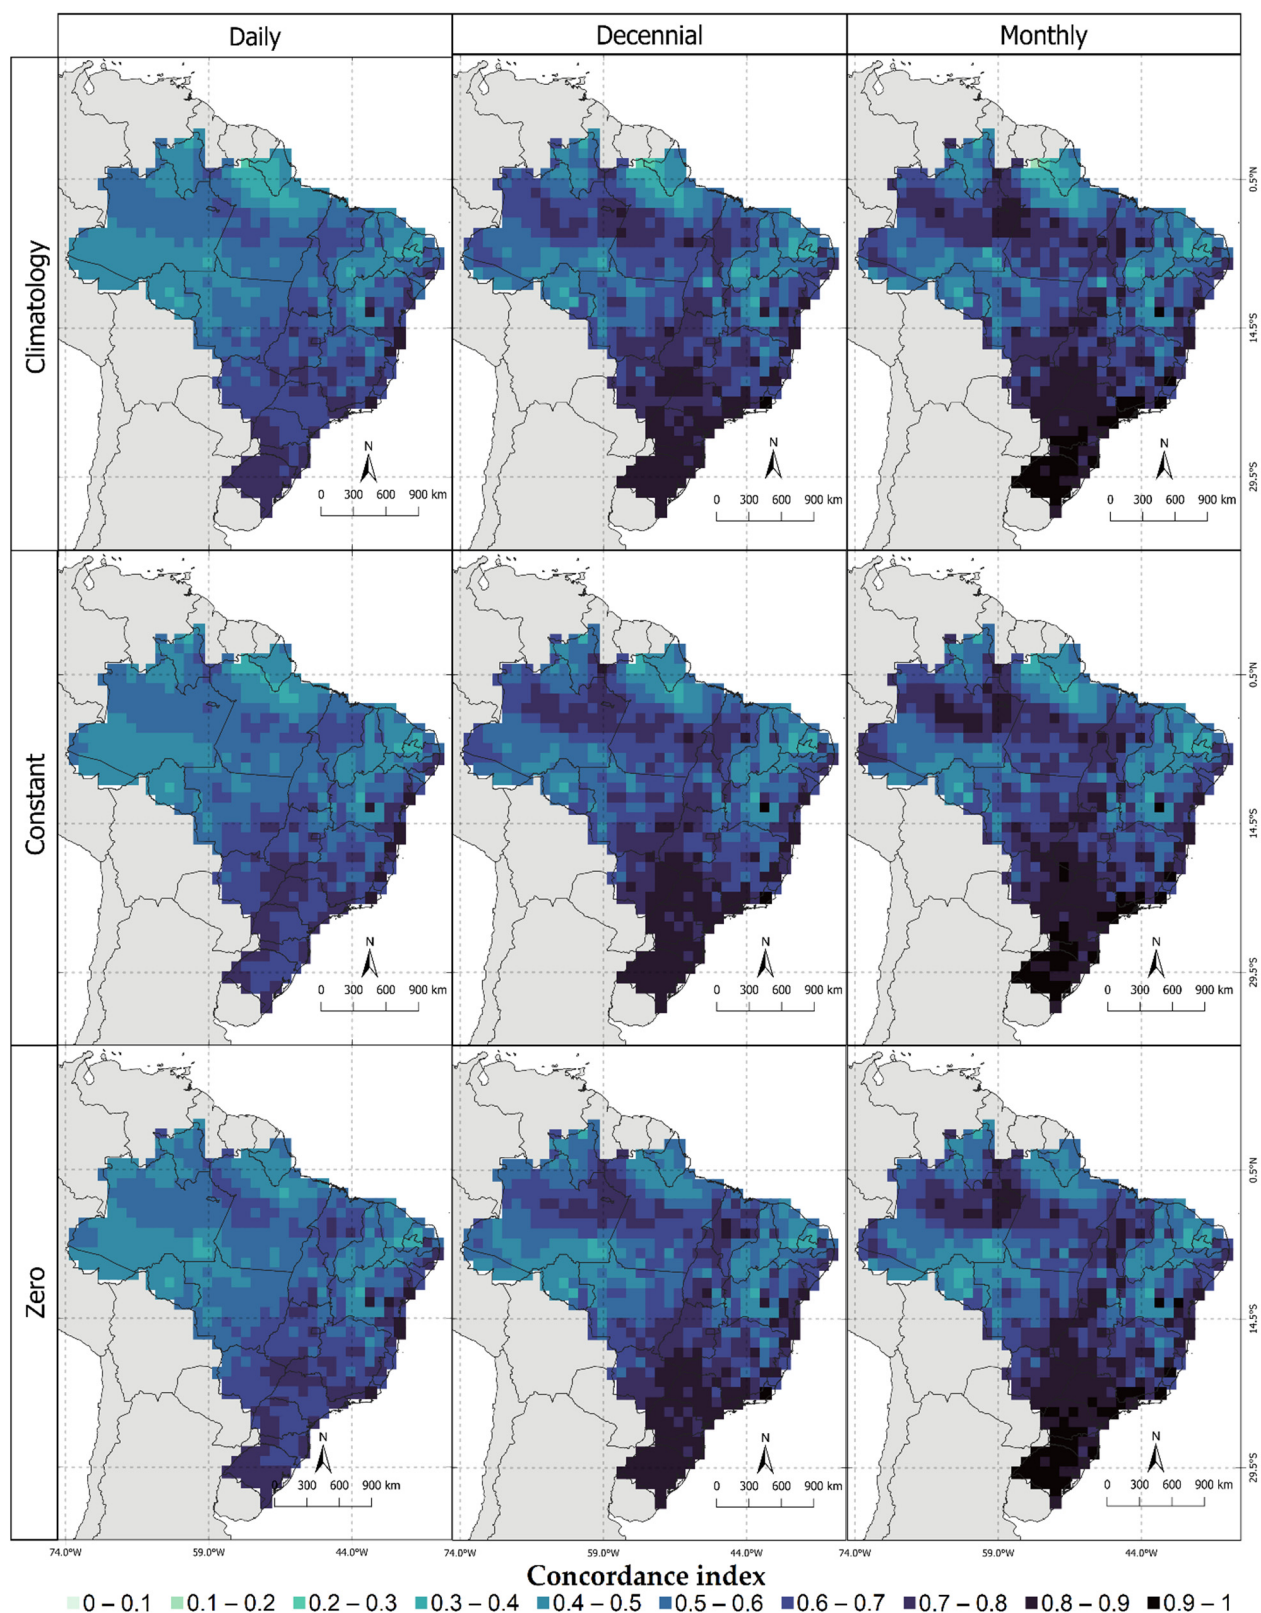

**Figure S15.** Average temperature CI. The upper panel is derived from the BAM-CLIM simulations, the middle panel is derived from the BAM-CTE simulations, and the bottom panel is derived from the BAM-ZERO simulations. The left column shows CI on a daily scale, the middle column shows CI on a decennial scale, and the right column shows CI on a monthly scale.



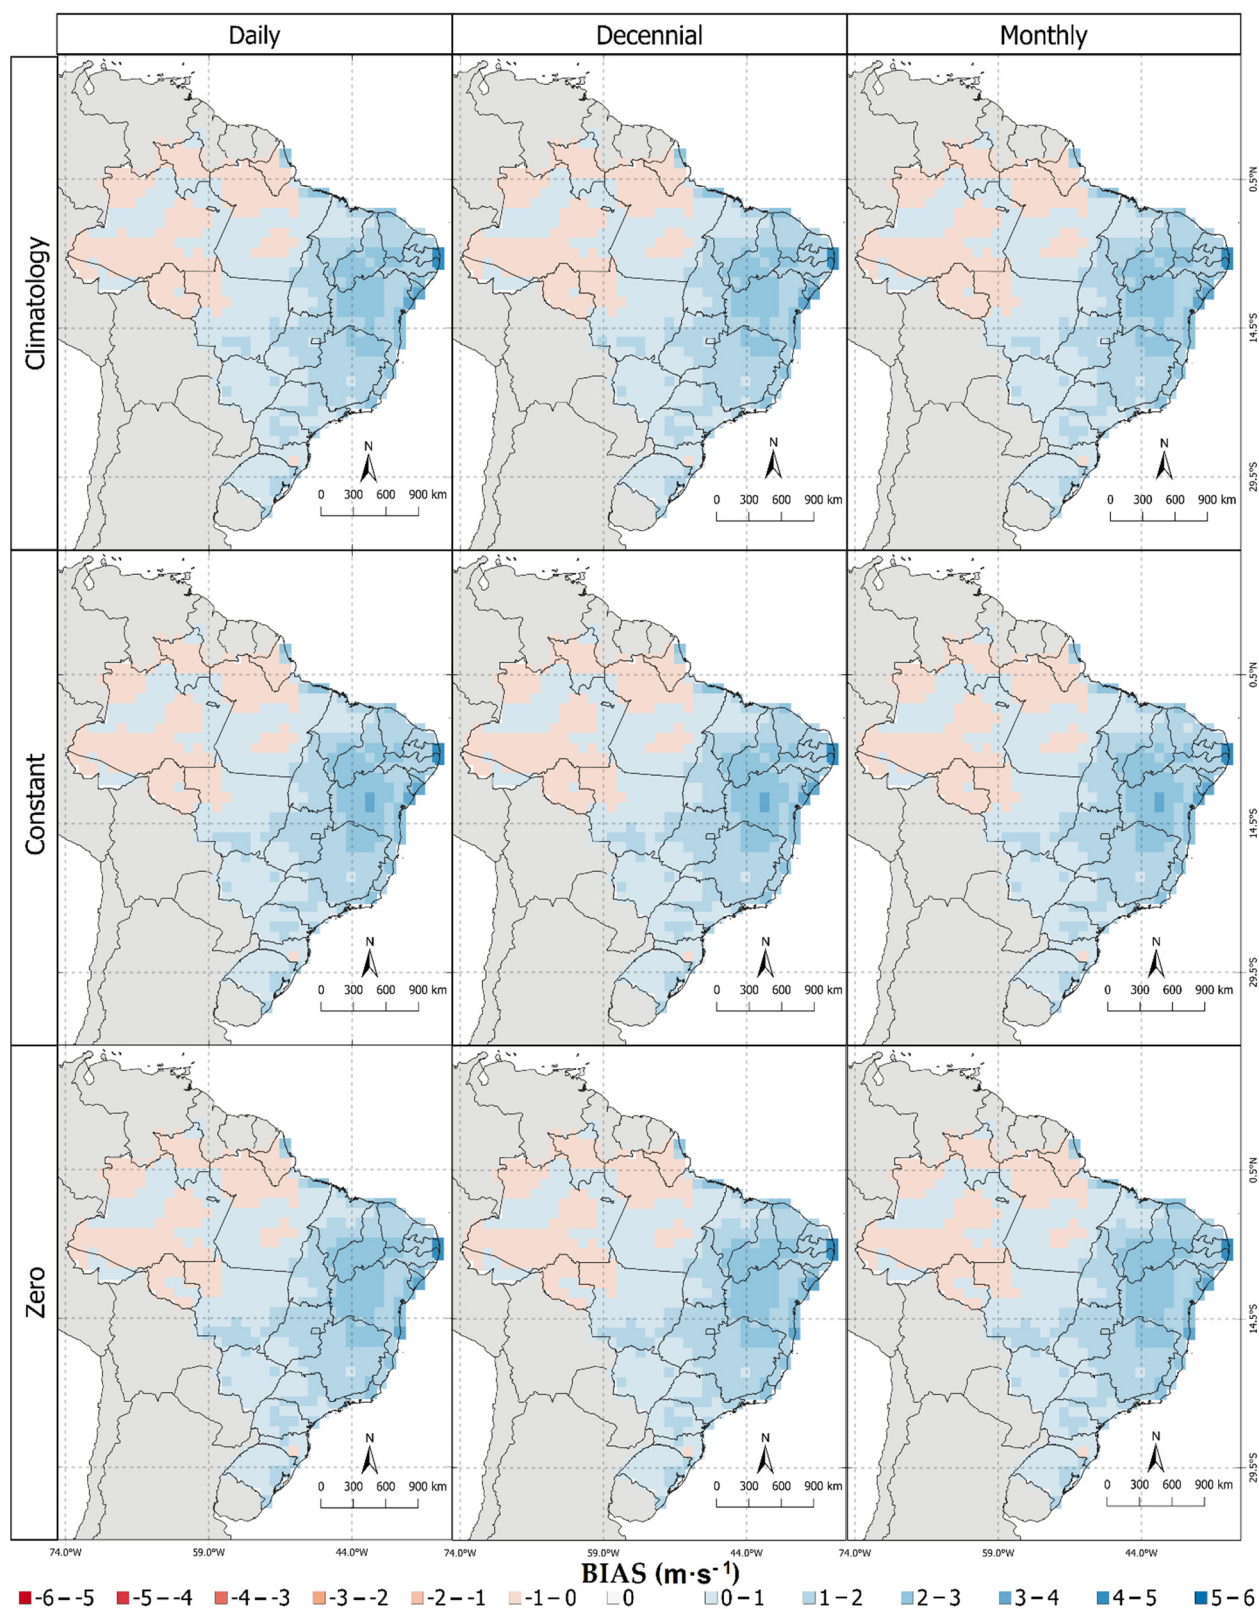

**Figure S16.** Wind speed BIAS ( $\text{m}\cdot\text{s}^{-1}$ ). The upper panel is derived from the BAM-CLIM simulations, the middle panel is derived from the BAM-CTE simulations, and the bottom panel is derived from the BAM-ZERO simulations. The left column shows BIAS on a daily scale, the middle column shows BIAS on a decennial scale, and the right column shows BIAS on a monthly scale.



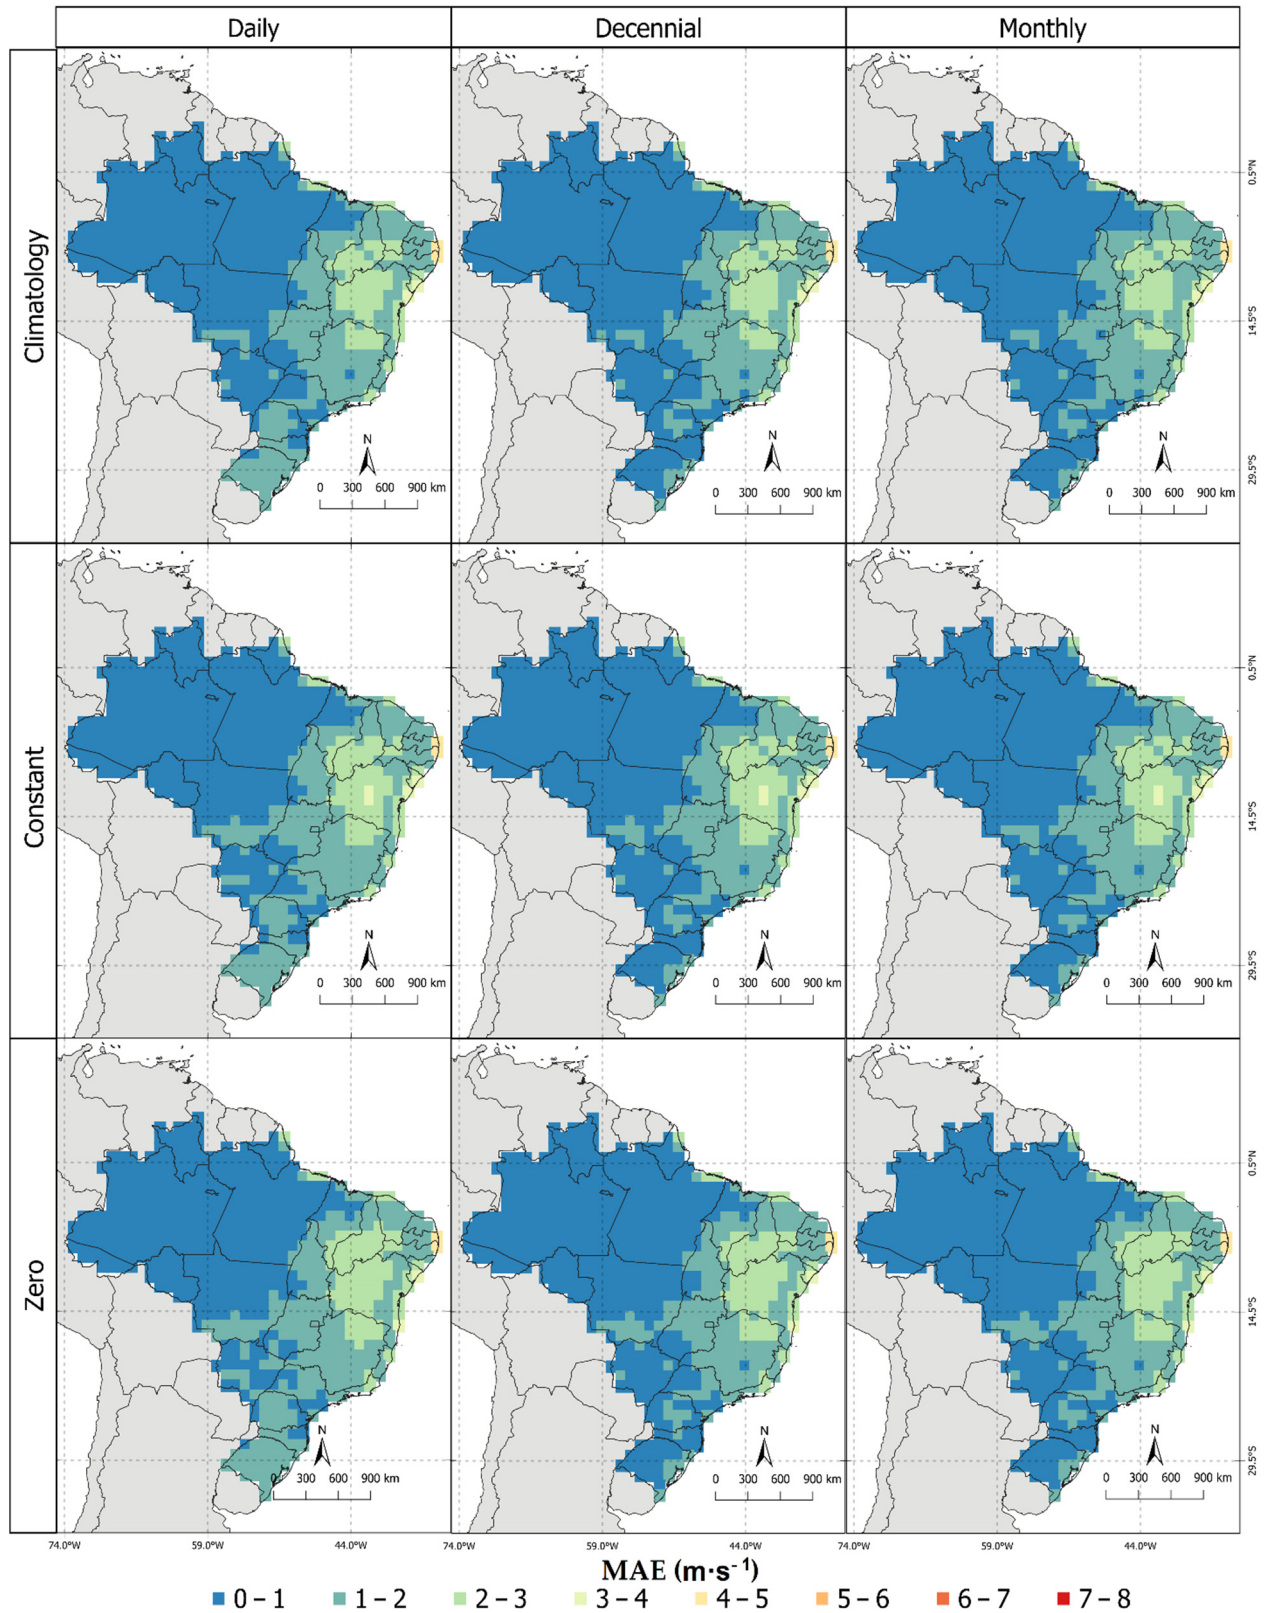

**Figure S17.** MAE of wind speed ( $\text{m}\cdot\text{s}^{-1}$ ). The upper panel is derived from the BAM-CLIM simulations, the middle panel is derived from the BAM-CTE simulations, and the bottom panel is derived from the BAM-ZERO simulations. The left column shows MAE on a daily scale, the middle column shows MAE on a decennial scale, and the right column shows MAE on a monthly scale.

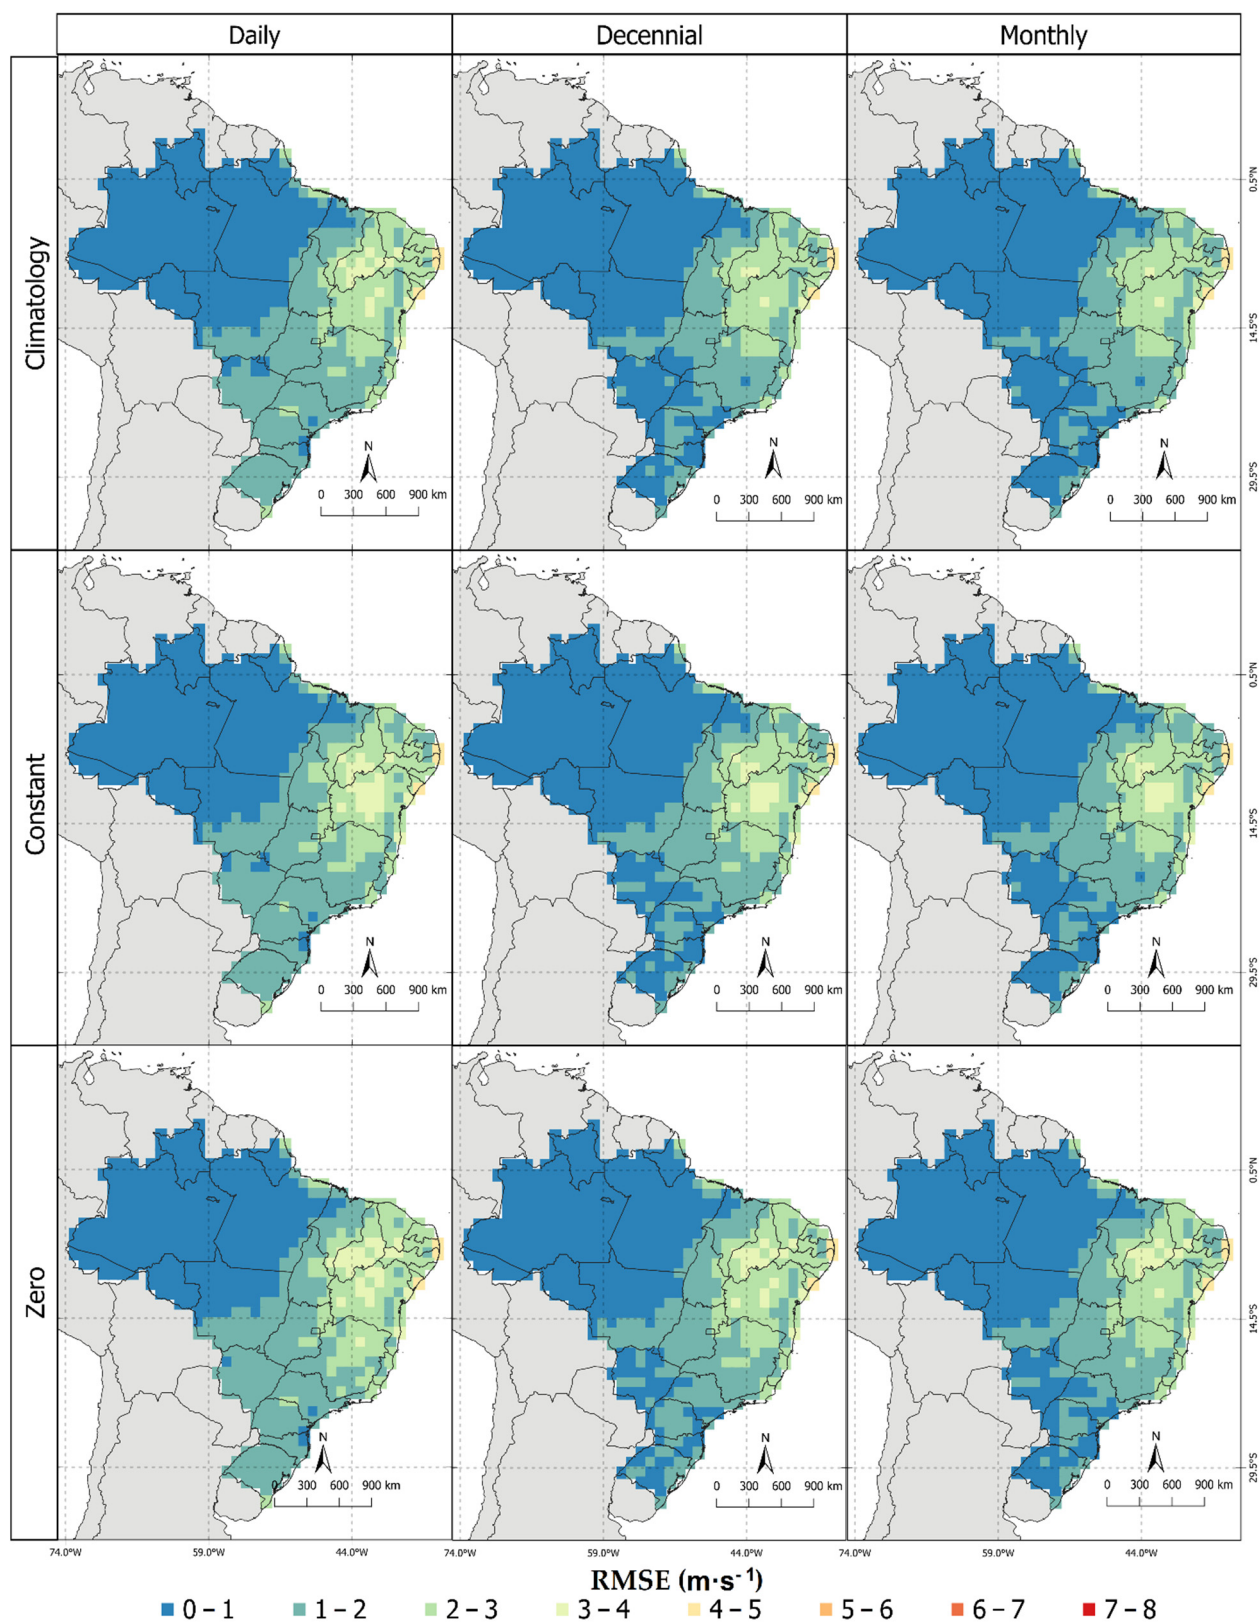

**Figure S18.** RMSE of wind speed ( $\text{m}\cdot\text{s}^{-1}$ ). The upper panel is derived from the BAM-CLIM simulations, the middle panel is derived from the BAM-CTE simulations, and the bottom panel is derived from the BAM-ZERO simulations. The left column shows RMSE on a daily scale, the middle column shows RMSE on a decennial scale, and the right column shows RMSE on a monthly scale.



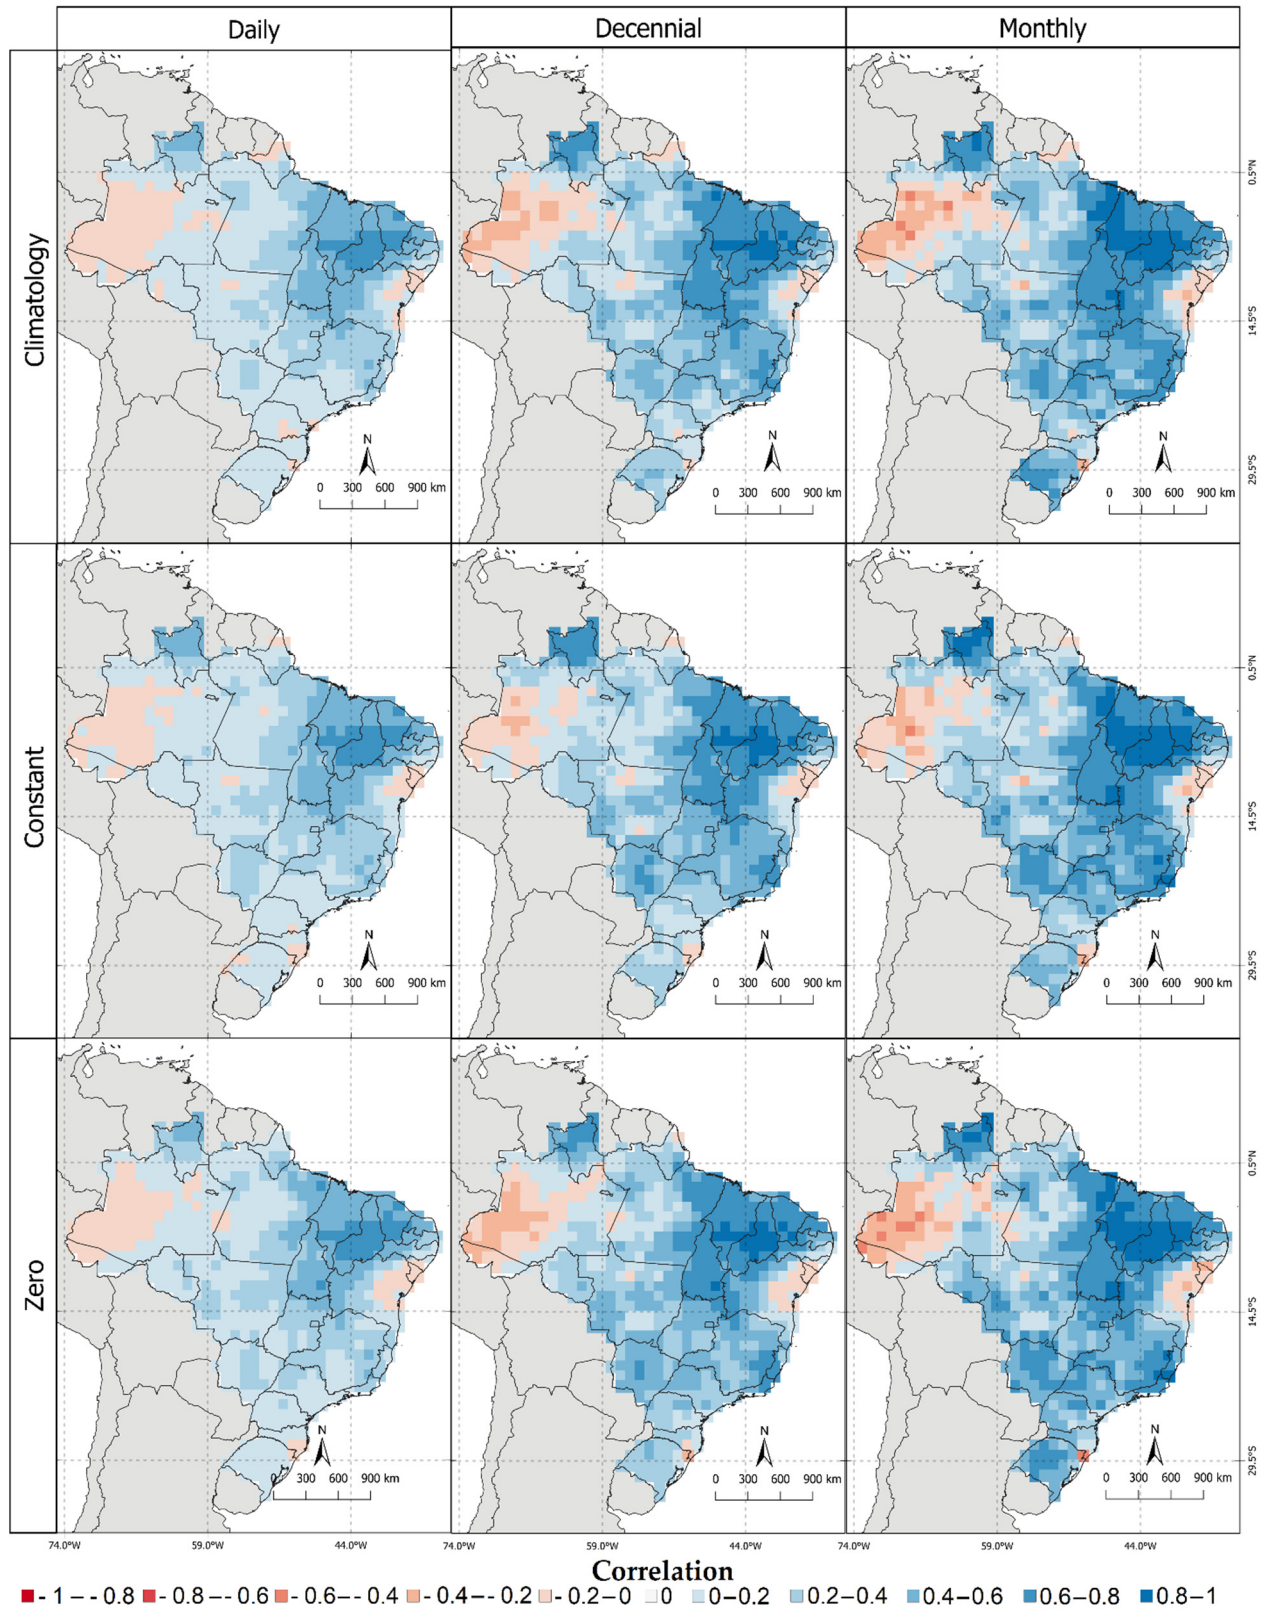

**Figure S19.** Correlation of wind speed. The upper panel is derived from the BAM-CLIM simulations, the middle panel is derived from the BAM-CTE simulations, and the bottom panel is derived from the BAM-ZERO simulations. The left column shows correlation on a daily scale, the middle column shows correlation on a decennial scale, and the right column shows correlation on a monthly scale.



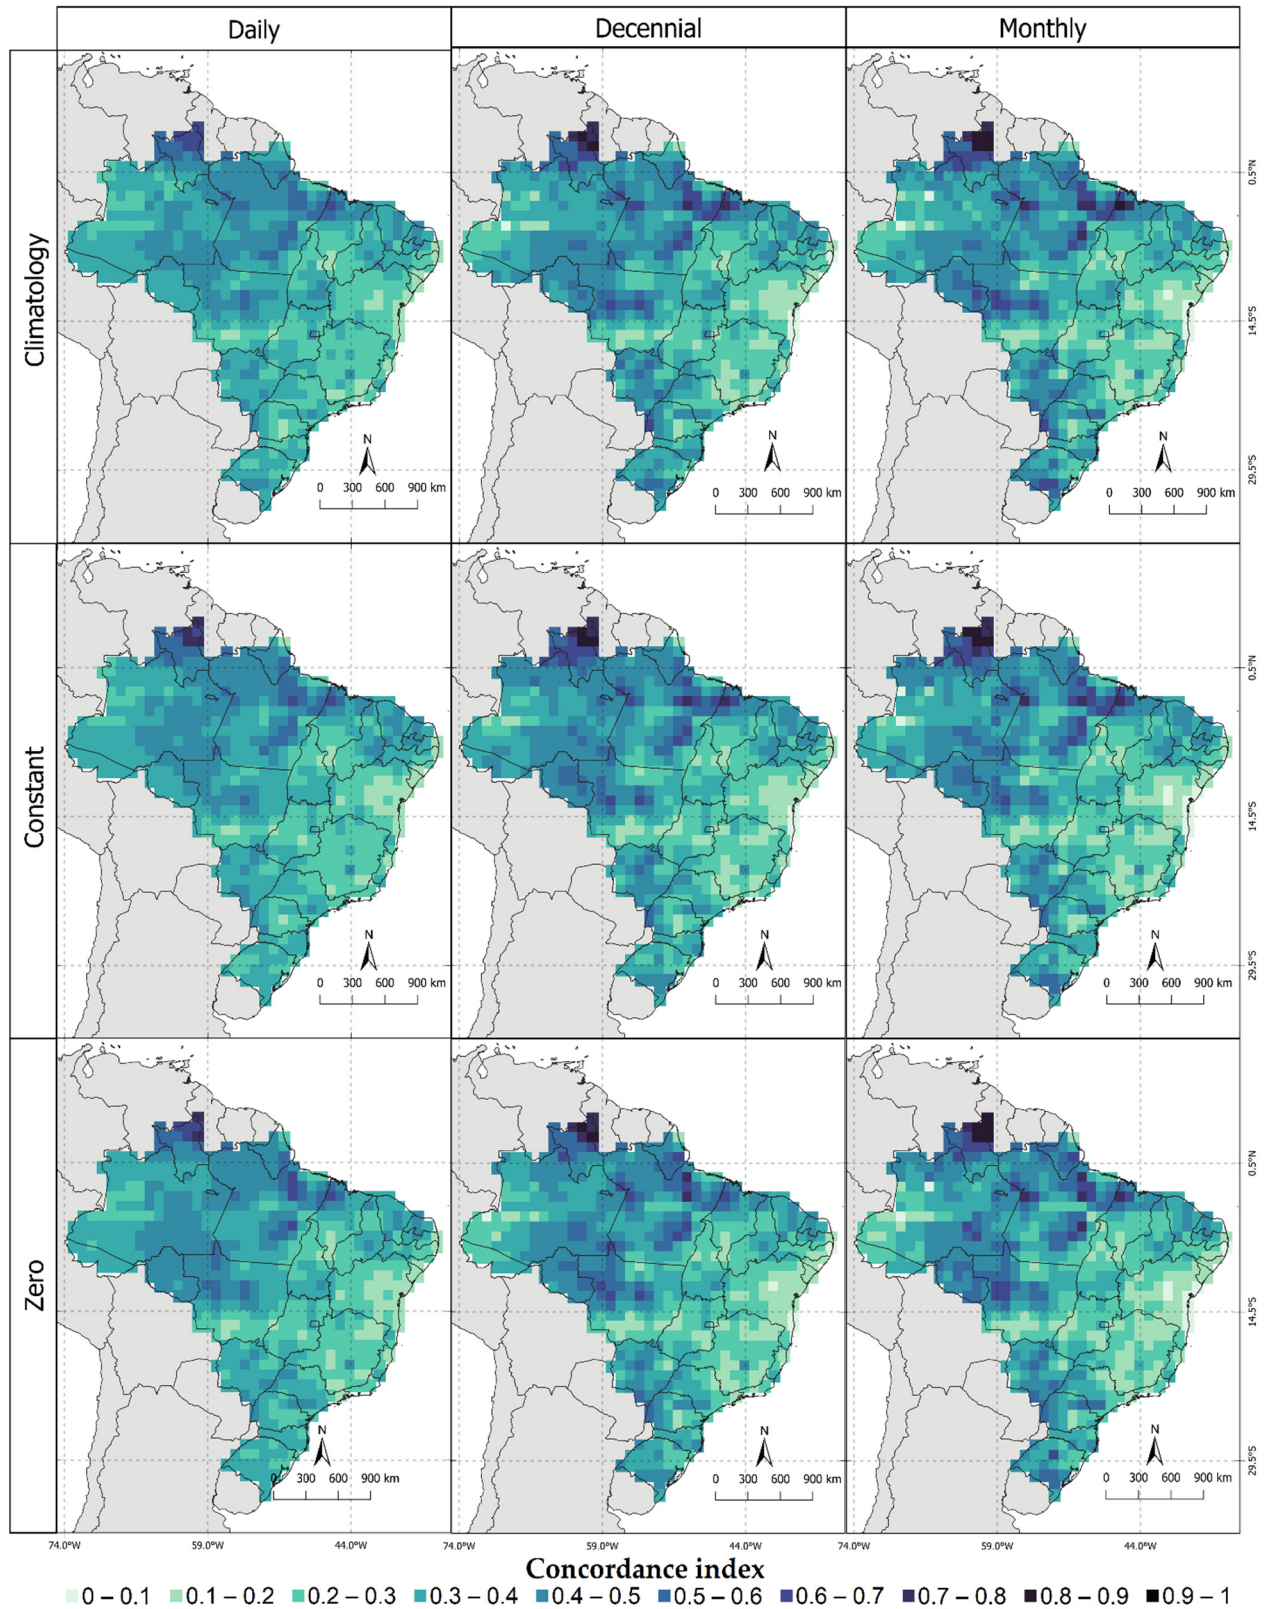

**Figure S20.** Wind speed CI. The upper panel is derived from the BAM-CLIM simulations, the middle panel is derived from the BAM-CTE simulations, and the bottom panel is derived from the BAM-ZERO simulations. The left column shows CI on a daily scale, the middle column shows CI on a decennial scale, and the right column shows CI on a monthly scale.
